1 **Short title:** DNE1 interacts with DCP1 and influences phyllotaxis

2

3 **Author for Contact details:**

4 \* To whom correspondence should be addressed. Email: [damien.garcia@ibmp-cnrs.unistra.fr](mailto:damien.garcia@ibmp-cnrs.unistra.fr) Tel:  
5 33(0)367155365 ; Fax : 33(0)367155300.

6

7

8 **A NYN domain protein directly interacts with DCP1 and is required**  
9 **for phyllotactic pattern in Arabidopsis**

10

11

12 Marlene Schiaffini<sup>1</sup>, Clara Chicois<sup>1</sup>, Aude Pouclet<sup>1</sup>, Tiphaine Chartier<sup>1</sup>, Elodie Ubrig<sup>1</sup>, Anthony Gobert<sup>1</sup>,  
13 Hélène Zuber<sup>1</sup>, Jérôme Mutterer<sup>1</sup>, Johana Chicher<sup>2</sup>, Lauriane Kuhn<sup>2</sup>, Philippe Hammann<sup>2</sup>, Dominique  
14 Gagliardi<sup>1</sup> and Damien Garcia<sup>1\*</sup>

15

16 1 Institut de biologie moléculaire des plantes, CNRS, Université de Strasbourg, Strasbourg, France.

17 2 Plateforme protéomique Strasbourg Esplanade du CNRS, Université de Strasbourg, Strasbourg,  
18 France.

19

20 **One-sentence summary:** DNE1, a NYN domain protein interacts with the decapping activator  
21 DCP1 and, together with DCP2, specify phyllotactic patterns in *Arabidopsis*.

22

23 **ABSTRACT**

24 In eukaryotes, general mRNA decay requires the decapping complex. The activity of this complex  
25 depends on its catalytic subunit, DCP2 and its interaction with decapping enhancers, including its  
26 main partner DCP1. Here, we report that in *Arabidopsis*, DCP1 also interacts with a NYN domain  
27 endoribonuclease, hence named DCP1-ASSOCIATED NYN ENDORIBONUCLEASE 1 (DNE1).  
28 Interestingly, we find DNE1 predominantly associated with DCP1 but not with DCP2 and reciprocally,  
29 suggesting the existence of two distinct protein complexes. We also show that the catalytic residues of  
30 DNE1 are required to repress the expression of mRNAs *in planta* upon transient expression. The  
31 overexpression of DNE1 in transgenic lines leads to growth defects and transcriptomic changes  
32 related to the one observed upon inactivation of the decapping complex. Finally, the combination of  
33 *dne1* and *dcp2* mutations, revealed a functional redundancy between DNE1 and DCP2 in controlling  
34 phyllotactic pattern formation in *Arabidopsis*. Our work identifies DNE1, a hitherto unknown DCP1  
35 protein partner highly conserved in the plant kingdom and identifies its importance for developmental  
36 robustness.

37

38 **INTRODUCTION**

39 Messenger RNA (mRNA) decay is crucial for the regulation of gene expression and is required for  
40 stress response and developmental transitions. Most mRNAs are degraded by the 5'-3' pathway which  
41 requires decapping of mRNA (Sorenson et al., 2018; Tuck et al., 2020). mRNA decapping is a highly  
42 conserved mechanism in eukaryotes and consists in the hydrolysis of the 5' m7G cap structure of the  
43 mRNA. Decapping produces an unprotected 5' phosphate extremity, rapidly attacked by the cytosolic  
44 5'-3' exoribonuclease, XRN1 in mammals and XRN4 in plants. The catalytic subunit of the decapping  
45 complex is the Nudix hydrolase DCP2, which requires interactions with enhancers of decapping to  
46 switch from its inactive to its active form (Chang et al., 2014; Wurm and Sprangers, 2019). These  
47 activators notably include DCP1, LSM14A, EDC4, PAT1, the LSM1-7 complex and the DDX6 RNA  
48 helicases in metazoans (She et al., 2008; Arribas-Layton et al., 2013). mRNA decapping represents a  
49 limiting step of many cellular RNA decay pathways. Decapping notably operates after mRNA  
50 deadenylation (Couttet et al., 1997), downstream of the action of microRNAs (Nishihara et al., 2013),  
51 on mRNAs containing premature termination codons, through the action of Nonsense Mediated Decay  
52 (Lejeune et al., 2003), as well as on mRNAs with specific stem-loop structures in their UTRs in  
53 Staufen Mediated Decay (Kim and Maquat, 2019).

54 In plants, decapping has been mainly studied in *Arabidopsis thaliana*, whose genome encodes  
55 orthologs of DCP2, DCP1, LSM14A called DECAPPING 5 (DCP5), three DDX6-like RNA helicases  
56 called RH6, RH8 and RH12 as well as an ortholog of EDC4 called VARICOSE (VCS) and its  
57 presumed inactive homolog VARICOSE RELATED (VCR) (Deyholos et al., 2003; Xu et al., 2006; Xu  
58 and Chua, 2009; Chantarachot et al., 2020). Null mutants of *DCP1*, *DCP2*, *DCP5* and *VCS* show  
59 defects in the formation of the vasculature of embryonic leaves and are seedling lethal (Deyholos et al.,  
60 2003; Xu et al., 2006). A recent transcriptome-wide decay rate analysis in *Arabidopsis* revealed the  
61 major role of VCS in mRNA decay, with VCS involved in the decay of 68% of mRNAs (Sorenson et al.,  
62 2018). Although the importance of components of the decapping machinery was clearly established  
63 for its role in plant growth, biotic and abiotic stress response, only very limited information about the  
64 corresponding protein complexes was gathered to date (Xu and Chua, 2012; Soma et al., 2017; Yu et  
65 al., 2019; Kawa et al., 2020). The only data were obtained early on by *in vitro* tests and/or transient  
66 expression strategies, but in contrast to other organisms, was not yet approached by unbiased  
67 strategies designed to study protein complexes *in vivo*. Fundamental differences in the composition of  
68 this complex in the plant kingdom, including the existence of plant specific partners could thus not be  
69 assessed.

70 In this work, we used an unbiased approach coupling immunoprecipitations (IPs) and mass  
71 spectrometry to define the interactome of the decapping activator DCP1 and the decapping enzyme  
72 DCP2. In addition to characterize the *Arabidopsis* decapping complex, our work identifies a NYN  
73 domain endoribonuclease as a direct protein partner of the decapping activator DCP1, therefore  
74 named DCP1-ASSOCIATED NYN ENDORIBONUCLEASE 1 (DNE1). The closest homologue of  
75 DNE1 in mammals is Meiosis regulator and mRNA stability factor 1 (MARF1), a NYN domain  
76 endoribonuclease necessary for meiosis progression and retrotransposon surveillance in oocytes (Su  
77 et al., 2012a; Su et al., 2012b; Nishimura et al., 2018). MARF1 is associated to the core decapping  
78 complex formed by DCP1, DCP2 and EDC4 (Bloch et al., 2014). In contrast, we show here data

79 suggesting the preferential association of DNE1 with DCP1 over DCP2. A phylogenetic analysis  
80 indicates that DNE1 is a highly conserved NYN domain protein in streptophytes and is likely an active  
81 enzyme as its catalytic residues are required to repress mRNAs upon transient expression.  
82 Furthermore, using a transcriptomic approach, we identified that overexpression of DNE1 leads to  
83 transcriptomic changes showing similarities with the ones observed upon inactivation of decapping.  
84 Finally, we identified that phyllotactic defects appear in *dne1 dcp2* double mutants demonstrating the  
85 redundant functions of DNE1 and DCP2 in developmental robustness.

86

## 87 **RESULTS**

88

### 89 **Identification of proteins associated with the decapping complex in *Arabidopsis***

90 To determine the composition of the decapping complex in *Arabidopsis*, we used an unbiased  
91 proteomic approach. This approach is based on IP experiments coupled to mass spectrometry  
92 analysis using transgenic lines expressing either a functional yellow fluorescent protein (YFP) fusion of  
93 DCP1 expressed under its endogenous promoter or a functional version of DCP2 expressed under the  
94 35S CaMV promoter (Goeres et al., 2007). Both IPs were efficient and provided access to both DCP1  
95 and DCP2 enriched extracts (Fig. 1A, Supplementary Table S1). These extracts were then analyzed  
96 by liquid chromatography coupled to tandem mass spectrometry (nanoLC-MS/MS). Wild-type non-  
97 transgenic plants were used as controls for the enrichment analysis. This strategy allowed the  
98 identification of 15 proteins significantly enriched with DCP1 (Fig. 1B, Supplementary Table S2) and 8  
99 proteins significantly enriched with DCP2 (Fig. 1C, Supplementary Table S3). The most enriched  
100 protein found with both DCP1 and DCP2 is VCS, which validates our approach. Of note, we also  
101 observed a strong enrichment of VCR, previously proposed not to be involved in decapping (Xu et al.,  
102 2006). Specifically enriched with DCP1, we found the DDX6-like RNA helicases RH6, RH8 and RH12,  
103 known to contact the decapping complex in mammals (Ayache et al., 2015) and that we recently found  
104 to co-purify with DCP5 and with the key player of NMD UPF1 (Chicois et al., 2018). An RNA helicase  
105 of the DDX3 family, RH52, in addition to 9 other proteins of unknown functions in RNA degradation  
106 was also specifically enriched. Among these factors, our attention was particularly drawn by a putative  
107 endonuclease (AT2G15560), enriched in DCP1, but not present in DCP2 IPs. We knew from our  
108 previous work on UPF1 interactome, that this protein also co-purified with both UPF1 and DCP5, and  
109 colocalized with UPF1 in cytoplasmic foci (Chicois et al., 2018). Because this predicted endonuclease  
110 was repeatedly found associated with RNA decay factors, we sought to further characterize its  
111 interactome, its influence on the transcriptome and its function in *Arabidopsis*. Based on the results  
112 presented hereafter, this protein was named DCP1-ASSOCIATED NYN ENDORIBONUCLEASE 1  
113 (DNE1).

114

### 115 **DNE1 directly interacts with DCP1**

116 Transcriptomic data indicated that DNE1 is broadly expressed during plant development together with  
117 DCP1 and DCP2, albeit often at lower levels (Supplementary Fig. S1). As a first step in DNE1

118 characterization, we determined its interactome by IPs coupled to LC-MS/MS analysis. Previously  
119 designed transgenic lines expressing the endonuclease fused to GFP (Chicois et al., 2018) were used  
120 to perform DNE1 IPs (Fig. 2A). Four factors known to be associated with the decapping complex were  
121 among the proteins significantly enriched in DNE1 IPs: DCP1, VCS, VCR and UPF1 (Fig. 2B,  
122 Supplementary Table S4). Interestingly, DCP1 was the most enriched protein in DNE1 IPs.  
123 Considering that DNE1 was also among top partners in DCP1 IPs, we tested for a possible direct  
124 interaction between DCP1 and DNE1 by yeast two hybrid (Y2H) assays. Indeed, yeast expressing  
125 both DCP1 and DNE1 showed fully restored growth on selective yeast media (Fig. 2C). Growth of the  
126 Y2H strain was also restored by co-expressing DCP1 and a version of DNE1 mutated in a predicted  
127 catalytic residue (D153N), suggesting that this interaction is independent of its catalytic activity.  
128 To our surprise, DCP2 was not significantly enriched in neither DNE1 (Fig. 2B) nor DCP1 IPs (Fig. 1B),  
129 and only a few mRNA decapping proteins were present in the DCP2 IPs (Fig. 1C). To test if the non-  
130 detection of DCP2 with DCP1 and the low efficiency of the DCP2 IPs can be solved by stabilizing  
131 transient or weak interactions, DCP1, DCP2 and DNE1 IPs were repeated with formaldehyde  
132 crosslinked protein extracts. In these conditions, we observed the association between DCP1 and  
133 DCP2 in both DCP1 and DCP2 IPs (Fig. 3A, 3B; Supplementary Tables S5, S6). In addition, we also  
134 found additional co-purifying partners linked to decapping in DCP2 IPs (including DCP1, RH6, RH8,  
135 RH12, UPF1 and PAT1, Fig. 3B; Supplementary Tables S6). Interestingly, DNE1 was only detected  
136 together with DCP1 but was again absent from DCP2 purifications (Fig. 3). In contrast, DCP1 was  
137 found together with both DCP2 and DNE1 (Fig. 3B, 3C; Supplementary Tables S6, S7). These data  
138 obtained upon crosslinking solve the initial low efficiency of DCP2 IPs. Although no definitive  
139 conclusions can be drawn from negative results in IP experiments, these data taken together are  
140 coherent with the existence of two different complexes, one comprising DCP1-DCP2 and one  
141 containing DCP1-DNE1.

142

#### 143 **DNE1 is a component of P-bodies**

144 Our previous work localized DNE1 in cytoplasmic foci with UPF1 upon transient expression, identifying  
145 DNE1 as a putative novel component of P-bodies (Chicois et al., 2018). To further validate this  
146 localization of DNE1 in P-bodies, we produced transgenic *Arabidopsis* lines expressing DNE1 (fused  
147 either to GFP or RFP) together with archetypal markers of either stress granules (PAB2-RFP) or P-  
148 bodies (YFP-DCP1, UPF1-RFP). In these lines, DNE1 did not colocalize with PAB2, both in the  
149 absence of stress, when PAB2 exhibits a diffuse localization (Pearson correlation coefficient 0.18, Fig.  
150 4) and under heat stress, when PAB2 is relocated in stress granules (Pearson correlation coefficient  
151 0.35; Fig. 4). By contrast, DNE1 perfectly colocalized with its protein partner DCP1 and with UPF1 in  
152 P-bodies (Pearson correlation coefficient 0.9, Fig. 4). We therefore concluded that DNE1 is a *bona*  
153 *fide* component of P-bodies in *Arabidopsis*.

154

#### 155 **DNE1 is a well conserved NYN domain protein in streptophytes and composed of three** 156 **domains**

157 To determine the evolutionary conservation of DNE1, we looked for orthologues of the *Arabidopsis*  
158 DNE1 protein in major plant lineages (rhodophytes, chlorophytes and streptophytes). We refined the  
159 results based on the presence of the structural domains found in *Arabidopsis* DNE1 that are one NYN  
160 domain and two consecutive OST-HTH domains. We found clear orthologues of DNE1 in basal  
161 streptophytes algae, mosses, ferns, gymnosperms and all flowering plants (Fig. 5A). We could not find  
162 NYN domains associated with predicted OST-HTH domains in the rhodophytes and chlorophytes  
163 phyla. However, we do not exclude the hypothesis that OST-HTH sequences could be more  
164 degenerated from the consensus in these lineages and therefore not recognized by the prediction  
165 software. Indeed, the sequence of NYN domain is more conserved (identity and similarity) than the  
166 OST-HTH domains in the streptophytes, especially the second OST-HTH (Supplementary Table S8).  
167 Of note, the second OST-HTH domain was not found in *Klebsormidium* a basal streptophytes alga but  
168 KfDNE1 was the most related enzyme to AtDNE1 in this specie. Overall, DNE1 is conserved in most if  
169 not all species of the streptophyte lineage indicating that its main function in plants is likely under  
170 selection pressure.

171 The typical structure of DNE1 is characterized by the presence of a NYN domain in the N-terminal part  
172 of the protein and of two OST-HTH domains in the C-terminal part (Fig. 5B). The length between the  
173 NYN domain and the two OST-HTH domains is variable with a larger region in early divergent species  
174 compared to more recent species (Fig. 5B). The most compact enzymes are found in the  
175 Brassicaceae (*Arabidopsis* family) with proteins whose sizes are under 500 amino-acids compared to  
176 600 aa in average for conifers and more than 700 aa in *Klebsormidium*. The alignment of the NYN and  
177 the OST-HTH1 domains shows that the catalytic domain is extremely conserved at the amino acid  
178 level, feature supported by the identity and similarity chart (Supplementary Table S8) while the RNA  
179 binding domains are slightly less conserved (Fig. 5C, 5D, Supplementary Table S8). Importantly, we  
180 identified the three aspartic acid residues known to be necessary for the enzymatic activity of NYN  
181 domains (Fig. 5C, 5E). These residues are strictly conserved in all plant species assessed (Fig. 5C).

182 The closest homologue of DNE1 in mammals is the endoribonuclease MARF1. In mammals, MARF1  
183 functions in female germlines where it is crucial for meiosis and defenses against damages caused by  
184 retrotransposons to the oocyte's genome (Su et al., 2012a; Su et al., 2012b). The tridimensional  
185 structure predictions of DNE1 protein domains fit well into the known tridimensional crystal structures  
186 of MARF1 domains, both for the NYN (Fig. 5E) and for the OST-HTH (Fig. 5F) domains. In addition,  
187 the conserved Asp catalytic residues (in orange Fig. 5E) share a similar location in the structural  
188 alignment of MARF1 and DNE1 NYN domains that strongly suggests that DNE1 is also an active  
189 enzyme. This possibility was supported by *in vivo* transient expression experiments of WT or a  
190 catalytic mutant of DNE1 (D153N) in *N. benthamiana*. In this experiment either RFP-DNE1 or RFP-  
191 DNE1<sup>D153N</sup> catalytic mutant was co-expressed with a reporter *GFP* mRNA in *N. benthamiana* leaves. A  
192 dramatic drop in the accumulation of the co-expressed *GFP* mRNA and three endogenous mRNAs  
193 was observed for three independent replicates 2.5 days after leaf infiltration of only RFP-DNE1 but not  
194 RFP-DNE1<sup>D153N</sup> (Fig. 6). Of note, this difference is not due to a lower expression of the DNE1-D153N  
195 mutant as RFP-DNE1-D153N accumulates to higher levels than RFP-DNE1 in this experimental setup  
196 (Supplementary Fig. S2). This result indicates that the transient expression of DNE1 represses the

197 accumulation of mRNAs and that this repression requires a wild-type NYN domain, supporting that  
198 DNE1 is an active NYN domain enzyme.

199

## 200 **DNE1 overexpression perturbs plant growth and show similar changes in gene expression** 201 **than decapping mutants**

202 To analyze the influence of DNE1 on the transcriptome, we tested the impact of the deregulation of  
203 DNE1 on *Arabidopsis* transcriptome using RNA-seq. For this purpose, we used three different genetic  
204 backgrounds: an insertion mutant (*dne1-1*), which harbors a T-DNA insertion within the *DNE1* coding  
205 sequence, and transgenic lines overexpressing protein fusions with GFP of either a WT (DNE1 OE) or  
206 a DNE1 point mutant (D153N OE) in *dne1-1* background. The point mutation is in a codon coding for a  
207 conserved aspartic acid residue and predicted to abolish the catalytic activity of DNE1. Visual  
208 inspections made during the growth of *dne1-1* mutant seedlings did not reveal any morphological  
209 defects. In contrast, the overexpressing lines of both DNE1 and D153N both showed growth  
210 retardation (Fig. 7A, Supplementary Fig. S3 and S4). We selected homozygous lines expressing  
211 DNE1 and D153N. Of note, we used a D153N OE line expressing lower protein levels than the wild-  
212 type DNE1 OE lines (Fig. 7B) as D153N lines with stronger protein expression could not be  
213 propagated. We analyzed the transcriptome of these lines and compared them with the transcriptome  
214 of wild-type plants and the null decapping mutant *vcs-6*. The global differences in gene expression  
215 were visualized on a histogram (Fig. 7C). Very little variation in gene expression was observed in  
216 *dne1-1*, with only 8 significantly deregulated genes. In contrast, DNE1 OE and D153N OE lines  
217 showed substantial transcriptome changes, while as expected massive deregulations occurred in *vcs-*  
218 *6*. Both DNE1 OE and D153N OE lines showed similar gene deregulation trend with more upregulated  
219 than downregulated transcripts. Indeed, we observed that 93% and 77% of the significantly  
220 deregulated transcripts were upregulated in WDNE1 OE and D153N OE, respectively. This result  
221 suggests that the overexpression of wild-type or mutant DNE1 might have similar effect and that this  
222 effect is likely not solely due to catalytic activity. Importantly, D153N expression affected more broadly  
223 the transcriptome than the expression of DNE1, with *ca* ten times more deregulated genes in D153N  
224 compared to DNE1. We found 64 commonly upregulated genes in DNE1 OE and D153N OE (Fig.  
225 7D). The significance of the overlap between DNE1 OE and D153N OE deregulated genes was tested  
226 using a hypergeometric test. With P-values of  $4.6 \times 10^{-42}$  for upregulated genes and  $4.1 \times 10^{-7}$  for  
227 downregulated genes, this result indicates a similar signature of transcriptomic changes in DNE1 and  
228 D153N (Table S9).

229 We then tested whether gene deregulation in DNE1 and D153N OE lines was related to genes  
230 deregulated upon inactivation of decapping. We thus compared the list of genes deregulated in the  
231 two DNE1 OE lines with those deregulated in the null decapping mutant *vcs-6*. Strikingly we observed  
232 a significant overlap of genes upregulated in *vcs-6* and genes upregulated either in DNE1 OE or in  
233 D153N OE (P-values: DNE1 =  $4.9 \times 10^{-66}$ , D153N =  $2.8 \times 10^{-307}$ ): 70% (132/188) and 63% (693/1103)  
234 of genes upregulated in DNE1 OE or in D153N OE respectively, are also up regulated in *vcs-6* (Fig.  
235 7D left panel, Table S9). In contrast, and as a negative control, the comparison *vcs* downregulated  
236 versus DNE1 OE or D153N OE upregulated, gave no significant overlap with p-values of 1 (Fig. 7D

237 right panel, Table S9). These results were validated by a Q-PCR experiment for a selection of 19  
238 targets with different profiles (Supplementary Fig. S5, Supplementary Table S10). This assay validates  
239 our global analysis with a different experimental setup and strengthen the previous observations.  
240 Among the 13 genes validated as upregulated in DNE1 OE and/or in D153N OE tested, 11 loci were  
241 validated to be also upregulated in *vcs-6*, reinforcing the link between the overexpression of DNE1  
242 and the effect of a mutation in VCS. In this analysis, 9 out of 13 upregulated genes were found more  
243 deregulated in D153N than DNE1, confirming the stronger effect of D153N expression compared to  
244 DNE1. Collectively those results indicate that overexpression of DNE1 altered gene expression in a  
245 manner reminiscent of *vcs* mutant plants, suggesting that DNE1, when overexpressed, alters the  
246 action of the decapping complex.

247

### 248 **Altering DNE1 expression or DCP2 action affects similar loci**

249 As VCS is associated with DCP1, DCP2 and DNE1, and in order to test a possible functional link  
250 between the decapping enzyme DCP2 and DNE1, we then compared transcriptomic data obtained by  
251 microarray for *tdt-1*, a previously reported *dcp2* allele (Goeres et al., 2007), with our RNA-seq data of  
252 *vcs-6* and D153N OE. As expected, a significant overlap was found between the *vcs* and the *dcp2*  
253 upregulated genes (P-value  $2.1 \times 10^{-37}$ ) with 67.8% of genes upregulated in *dcp2* also upregulated in  
254 *vcs* (98/142, Fig. 7F). Interestingly, there was also a significant overlap of genes upregulated in  
255 *dcp2* and D153N (P-value of  $3.1 \times 10^{-48}$ ) with 37% of genes upregulated in *dcp2* also upregulated  
256 in D153N upregulated genes (53/142; Fig. 7F). Altogether, these analyses indicate a strong  
257 functional links between DNE1, VCS and DCP2. This comparison shows that the overexpression of  
258 D153N has perturbed the accumulation of a set of mRNAs also affected by mutation in *DCP2*. In  
259 support of this observation, we tested if mRNAs deregulated in D153N OE are enriched in targets of  
260 the decapping complex. We thus compared our RNA seq data for D153N OE and *vcs* with degradome  
261 sequencing data obtained by GMUCT (Anderson et al., 2018), a sequencing protocol which quantifies  
262 the accumulation of uncapped transcripts. Strikingly, in this comparison, only the upregulated genes in  
263 *vcs* and DNE1 D153N OE were enriched in loci accumulating uncapped transcripts (Fig. 7G). This  
264 results further strengthen our previous conclusion and validate that the deregulations observed in  
265 D153N OE seems to preferentially affect targets of the decapping complex.

266

### 267 **Mutations in DNE1 affect the robustness of phyllotaxis when DCP2 function is altered**

268 To investigate the functional link between DNE1 and DCP2, we produced double mutants between  
269 *its1*, a weak allele of *dcp2* mutated in its catalytic domain (called *dcp2<sup>its1</sup>* thereafter) and two *dne1*  
270 point mutants generated by CRISPR/Cas9 (*dne1-2* and *dne1-3*, Supplementary Table S11). The  
271 *dne1-3* mutant contains a 39 nt insertion leading a premature termination codon early in *DNE1* NYN  
272 domain, whereas *dne1-2* contains a 21nt in frame deletion at position 193, which predicts the  
273 production of a DNE1 protein with a 7 amino acids (aa) deletion in the catalytic domain. Neither the  
274 weak *dcp2<sup>its1</sup>* mutant, nor the *dne1-2* and *dne1-3* showed any obvious morphological defects. In  
275 contrast, *dne1 dcp2<sup>its1</sup>* double mutants showed defects in the maintenance of the phyllotactic pattern

276 produced by the floral meristem (Fig. 8A). We quantified this defect by measuring divergent angles  
277 between successive siliques on the main stem (Fig. 8B). Overall, we made measurements for  
278 between 30 to 40 plants per genotype in three to four biological replicates, and measured divergent  
279 angles between 35 siliques per plant on the main stem. These measures clearly show an increased  
280 proportion of non-canonical divergent angles occurring specifically and reproducibly in *dne1 dcp2<sup>its1</sup>*  
281 double mutants and not in *dcp2<sup>its1</sup>* and *dne1* single mutants compared to WT. The defects observed in  
282 the double mutants were confirmed by the analysis of the divergent angles distribution using the  
283 Kolmogorov-Smirnov test, with p-values showing significant difference from the WT for *dcp2<sup>its1</sup> dne1-3*  
284 (P-value  $6.5 \times 10^{-8}$ ) and *dcp2<sup>its1</sup> dne1-2* (P-value  $2.2 \times 10^{-16}$ , Fig. 8B, Table S12). These defects also  
285 appeared reproducibly on every biological replicate, when analyzed separately (Supplementary Fig.  
286 S6). This analysis demonstrates the synergistic effect of *dne1* and *dcp2<sup>its1</sup>*, revealing the redundant  
287 function of DCP2 and DNE1 in the establishment of phyllotaxis in the floral meristem. Interestingly, we  
288 could identify similar defects in *xrn4*, a mutant affected in the 5'-3' mRNA degradation pathway (P-  
289 value  $2.2 \times 10^{-16}$ , Fig. 8), suggesting that the observed phenotype results from an increased defect in  
290 mRNA degradation in the *dne1 dcp2<sup>its1</sup>* double mutant.

291

## 292 DISCUSSION

293 In this study, we identified DNE1, a previously uncharacterized protein harboring an  
294 endoribonuclease domain of the NYN family and two OST-HTH domains, as a direct protein partner of  
295 DCP1. DNE1 accumulates together with DCP1 in P-bodies and is expressed throughout the plant  
296 lifecycle. We found that DNE1 is ubiquitous in streptophytes. This conservation for more than half a  
297 billion years suggests an important function. The perfect conservation in plants of aspartates residues  
298 known to be crucial for the catalytic activities of NYN-domain enzymes, strongly suggests that the  
299 activity of DNE1 is under a significant selection pressure (Matelska et al., 2017). The *in vivo* transient  
300 expression of wild-type DNE1 represses the expression of several mRNAs, whereas a catalytic mutant  
301 cannot, suggesting that DNE1 catalytic activity targets mRNAs. The constitutive overexpression of  
302 DNE1 in stable lines leads to growth defects and a similar gene deregulation signature than  
303 plants in which decapping is compromised. Finally, we present genetic evidences of a functional  
304 redundancy between DNE1 and DCP2 in controlling the robustness of phyllotactic pattern  
305 formation.

306 We initially identified DNE1 in UPF1 IPs, raising the possibility that this protein could be the plant  
307 equivalent of the PIN domain endoribonuclease SMG6 in animal (Chicois et al., 2018). We found that,  
308 UPF1 co-purifies with DNE1 (44 spectra; Supplementary Table S7) and is also detected with DCP2 (8  
309 spectra; Supplementary Table S6). This observation indicates first that UPF1 is coupled with the  
310 decapping complex in plants, as described in mammals (Lejeune et al., 2003) and that it is in addition  
311 coupled to a protein complex containing DCP1 and the endonuclease DNE1. A recent analysis of RNA  
312 fragments stabilized in *xrn4* reports the accumulation of NMD targets intermediates produced by  
313 endonucleolytic cleavage in plants (Nagarajan et al., 2019). Our results put DNE1 in the position of  
314 being the favored candidate to exert such an activity.



315 An interesting parallel can be made between our findings and one of the results of the recent  
316 systematic analysis by *in vivo* proximity-dependent biotinylation (BioID) of 119 human proteins  
317 associated to mRNA biology (Youn et al., 2018). This analysis identified correlated patterns between  
318 endogenous preys and enabled the definition of 144 core components of SGs and P-bodies. Among  
319 the P-body components, a correlation cluster appeared around decapping factors (cluster2).  
320 Interestingly, this cluster contained the closest homolog of DNE1 in human, the endonuclease MARF1.  
321 In both cases, MARF1 and DNE1 represent NYN domain proteins very tightly associated with proteins  
322 of the decapping complex. An in-depth molecular phylogenetic study across phyla is necessary to reveal  
323 whether both genes have a common ancestry, originate from an early horizontal gene transfer or are  
324 the results of convergent evolution between evolutionary distant phyla.

325 Our study reveals a synergistic phyllotactic phenotype observed in *dne1 dcp2*, which can lead to two  
326 alternative models for DNE1 action. Either DNE1 acts together with the decapping complex, in a  
327 specific complex containing DNE1-DCP1-DCP2 working in parallel of the canonical DCP1-DCP2  
328 decapping complex, or DNE1 exists in an alternative DNE1-DCP1 complex sharing targets with the  
329 decapping complex. The first possibility is reminiscent of the mode of action of its human homologue  
330 MARF1, proposed to recruit decapping factors to stimulate the degradation of its target (Nishimura et  
331 al., 2018). We do not have experimental data supporting the existence of a DCP1-DCP2-DNE1  
332 complex. Our study of proteins associated with DCP1, DCP2 and DNE1 is more in favor of the second  
333 hypothesis and suggests the existence in plants, of a protein complex based on DCP1-DNE1 in  
334 parallel of the canonical decapping complex based on DCP1-DCP2. Comparing DCP1, DCP2 and  
335 DNE1 protein copies per cell (pcc) as found in a recent global proteomic analysis (Bassal et al., 2020)  
336 reveal that DCP1 is the more abundant protein (234128 pcc) followed by DCP2 (67345 pcc) and finally  
337 DNE1 (791 pcc). This data supports the existence of a main complex containing DCP2 and of an  
338 accessory complex containing DNE1. The importance of this accessory complex is revealed by its  
339 compensatory effect upon the partial loss of DCP2 function in the weak *dcp2<sup>its1</sup>* mutant, demonstrating  
340 its importance for phyllotactic pattern formation. A functional link between DNE1 and DCP2 actions is  
341 further supported by our observation that the stable overexpression of DNE1 leads to transcriptomic  
342 changes related to the one observed in decapping mutants and to an increased accumulation of  
343 targets of the decapping complex (Fig. 7). One way among many to construe this observation is that  
344 DNE1 overexpression could compromise the formation of the decapping complex by competing for a  
345 common partner, like DCP1. However, a detailed study of the interaction domains between DNE1 and  
346 DCP1 will be required in order to test this hypothesis experimentally.

347 Interestingly, the phyllotactic defects observed in *dne1 dcp2<sup>its</sup>* are also detected in *xrn4* mutant,  
348 impaired in 5'-3' RNA degradation (Fig. 8). This observation supports a possible genetic redundancy  
349 between DCP2 and DNE1 in mRNA degradation. This genetic redundancy also provides a plausible  
350 explanation to the absence of deregulated genes in *dne1* single mutant, DNE1 as part of an accessory  
351 complex, becoming limiting only in case of DCP2 deficiency. Phyllotaxis is controlled by an intricate  
352 hormonal balance involving both auxin and cytokinin (Reinhardt et al., 2003; Besnard et al., 2014).  
353 Further studies will be required to decipher the RNA substrates targeted by DNE1, DCP2 and XRN4  
354 explaining this observation. Identifying DNE1 targets may also benefit from a recent study indicating

355 that the OST-HTH domains of both DNE1 and its homologue MARF1 have affinity for RNA G-  
356 quadruplex (G4), a very specific RNA tertiary structure (Ding et al., 2020). These data suggest that  
357 both DNE1 and MARF1 can target G4 containing RNAs and open very interesting perspectives for the  
358 study of the targets and biological functions of these NYN domain endoribonucleases.

359

## 360 **MATERIAL AND METHODS**

### 361 **Plant material**

362 Plant lines used: *dne1-1* (Salk\_132521); *vcs-6* (SAIL\_831\_D08); pDCP1::YFP-DCP1 in *dcp1-3*  
363 (SAIL\_377\_B10); p35S::GFP-DCP2 in *tdt-1* (a *dcp2* mutant); pPABP2::tRFP-PABP2 in WT Col,  
364 p35S::GFP-DNE1 in *dne1-1*, p35S::GFP-DNE1-D153N in *dne1-1*; p35S::RFP-DNE1 in *dne1-1*; *dne1-2*  
365 and *dne1-3* were created by the CRISPR/Cas9 system using the sgRNA target sequence:  
366 TCTTCAGGACGTACATCGCT inserted in pKIR1.1 to target DNE1 NYN domain (Tsutsui and  
367 Higashiyama, 2017). For IP experiments plants are grown on soil in long-day light conditions (16/8)  
368 until flowering and unopened flower buds are collected. For RNAseq experiments surface sterilized  
369 seeds (70% ethanol, 0.1% Triton-X 100, washed 5 min with 100% ethanol) are sown on solid MS  
370 medium (MS0255 Duchefa®, 1% agar, 1% sucrose, pH 5.7). After 48h of stratification at 4 °C  
371 seedlings are grown in long-day light conditions at 21 °C for 14 days.

372

### 373 **Plasmids**

374 Sequence from genomic DNA has been cloned in pB7WGF2, pH7WGR2 gateway destination vectors  
375 harboring GFP, RFP sequences respectively to produce N-ter tagged versions of DNE1 both wild-type  
376 and catalytic mutant D153N. DNE1 and DCP1 sequences amplified from cDNA were cloned into  
377 pGBT9 and pGADT7 to perform Y2H.

378

### 379 **Immunopurifications**

380 Details about samples and replicates of co-immunopurification (IP) experiments are provided in  
381 Supplementary Table S1. For IPs 0.3 g of flower buds were ground in 1.5 ml of ice-cold lysis buffer (50  
382 mM Tris-HCl pH 8, 50 mM NaCl, 1 % Triton X-100, supplemented with Roche cOmplete, EDTA-free  
383 Protease Inhibitor Cocktail). After cell debris removal by centrifugation (twice 10 min at 16,000 g, 4°C),  
384 supernatants were incubated for 30 min with 50 µl of magnetic microbeads coupled to anti-GFP  
385 antibodies (Miltenyi). Beads were loaded on magnetized µMACS separation columns equilibrated with  
386 lysis buffer and washed four times with 200 µl of washing buffer (20 mM Tris-HCl pH 7.5, 0.1 % Triton  
387 X-100). Samples were eluted in 100 µl of pre-warmed elution buffer (50 mM Tris-HCl pH 6.8, 50 mM  
388 DTT, 1 % SDS, 1 mM EDTA, 0.005 % bromophenol blue, 10 % glycerol). Negative control IPs were  
389 performed under the exact same conditions with WT plants. For IPs crosslink, 0.3 g of flower buds  
390 were ground during 10 min in 2.25 ml of ice-cold lysis buffer supplemented with 0.375 % formaldehyde  
391 (Thermo Fisher Scientific). The crosslinking reaction was quenched by adding glycine at a final  
392 concentration of 200 mM for 5 min. After cell debris removal by centrifugation (twice 15 min at 10,000

393 g, 4°C), supernatants were incubated for 45 min with 50 µl of magnetic microbeads coupled to anti-  
394 GFP antibodies (Miltenyi). Beads magnetic capture and washing steps were done according to the  
395 manufacturer's instructions, except that washes were performed with 50 mM Tris-HCl pH 7.5, 50 mM  
396 NaCl, 0.1% Triton X-100, supplemented with Roche cOmplete, EDTA-free Protease Inhibitor Cocktail.  
397 Samples were eluted as previously described. Negative control IPs were performed with beads  
398 coupled to anti-GFP antibodies in WT plants.

399

#### 400 **Mass spectrometry analysis and data processing**

401 Eluted proteins were digested with sequencing-grade trypsin (Promega) and analyzed by nano  
402 LCMS/MS on a QExactive + mass spectrometer coupled to an EASY-nanoLC-1000 (Thermo Fisher  
403 Scientific). IP data were searched against the TAIR 10 database with a decoy strategy. Peptides were  
404 identified with Mascot algorithm (version 2.5, Matrix Science) and data were imported into Proline 1.4  
405 software. IP data were searched against the TAIR 10 database with a decoy strategy. Peptides were  
406 identified with Mascot algorithm (version 2.5, Matrix Science) and data were imported into Proline 1.4  
407 software (Bouyssié et al., 2020). Proteins were validated on Mascot pretty rank equal to 1, Mascot  
408 score above 25, and 1% FDR on both peptide spectrum matches (PSM score) and protein sets  
409 (Protein Set score). The total number of MS/MS fragmentation spectra was used to quantify each  
410 protein from at least three independent IPs. Volcano plots display the adjusted p-values and fold  
411 changes in Y and X-axis, respectively, and show the enrichment of proteins co-purified with tagged  
412 proteins as compared to control IPs. The statistical analysis based on spectral counts was performed  
413 using a homemade R package (<https://github.com/hzuber67/IPinquiry4>) that calculates fold change and  
414 p-values using the quasi-likelihood negative binomial generalized log-linear model implemented in the  
415 edgeR package. The size factor used to scale samples were calculated according to the DESeq2  
416 normalization method (i.e., median of ratios method). P-value were adjusted using Benjamini  
417 Hochberg method from stats R package.

418

#### 419 **Phylogeny and structural modlisation**

420 Phylogenetic trees were done with the <http://www.phylogeny.fr> web tool. Multiple alignments have  
421 been made using MUSCLE (v3.8.31). Positions with gaps have been eliminated. The phylogenetic  
422 tree has been built using the maximum likelihood method implemented in PhyML (v3.1/3.0 aLRT,  
423 approximate likelihood-ratio test). Bootstrap values were calculated on 100 iterations. Graphic  
424 representation of the tree was done with TreeDyn (v198.3). The structures of AtDNE1 NYN and OST-  
425 HTH domains were modelized using Phyre2: Protein Homology/analogYRecognition Engine V  
426 2.0 (Kelley et al., 2015). The alignment of the structural models produced with NYN HsMARF (PDB ID:  
427 6fdl) and OST-HTH MmMARF1 (PDB ID: 5yad) were done using PyMOL software.

428

#### 429 **Agroinfiltration**

430 Competent agrobacteria (GV3101 pMP90) were transformed with vectors containing fluorescent  
431 fusion proteins DNE1 WT, mutant D153N, GFP reporter gene or the silencing suppressor P14. *N.*

432 *benthamiana* leaves were co-infiltrated with bacterial suspension containing DNE1 WT, or D153N,  
433 reporter GFP and P14 in a 1:1:1 ratio (Garcia et al., 2014). Infiltrated tissues were collected 3 days  
434 after infiltration.

435

#### 436 **Subcellular localization analysis**

437 Seven day-old epidermal roots cells of stable *A. thaliana* lines expressing the desired constructs were  
438 imaged using a LSM780 confocal microscope (Zeiss) with a 40X objective. Co-localization analysis  
439 was performed with ImageJ as follows: foci in images were determined with a user-supervised local  
440 maxima detection method (script available on demand). Local intensities in channels visualizing GFP  
441 or RFP fusion proteins were measured for every detected focus and the reported values were then  
442 charted in a (IGFP versus IRFP) scatter plot for further qualitative assessment of fluorescent spot  
443 content correlation.

444

#### 445 **Libraries preparation and RNA seq analysis**

446 Transcriptomic analysis was performed on biological triplicates of 14 day-old seedlings of the *dne1-1*  
447 mutant, two independent DNE1 OE lines analyzed together (P35S-GFP::DNE1), an DNE1\_D153N OE  
448 line (35S:GFP-DNE1\_D153N). Purified total RNAs were quantified by Qubit (Invitrogen) fluorimeter,  
449 RNA's quality was tested using Bioanalyzer 2100 (Agilent) system. Two micrograms of RNAs were  
450 used for libraries preparation with the mRNA-Seq Library Prep Kit V2 for Illumina Platforms (Lexogen)  
451 using manufacturer's instructions. Libraries were sequenced by single read (50 cycles) at GenomEast  
452 sequencing platform (IGBMC, Strasbourg) with an Illumina HiSeq 4000. Fastq files were generated  
453 using RTA (v2.7.3) and bcl2fatq (v2.17.1.14). Sequences were mapped on *A. thaliana* genome  
454 (TAIR10) with Hisat2 (v2.1.0) using default parameters except for intron lengths that have been  
455 reduced at 2000 bp. After alignment, the number of reads mapped to each gene were counted with  
456 HTseqcount (v0.10.0) using the annotation document  
457 Araport11\_GFF3\_genes\_transposons.201606.gff. Statistical analysis was performed on R (v3.6) with  
458 DEseq2 package (v1.24.0) and its implemented negative binomial distribution. Adjusted p-values were  
459 calculated using the Benjamini and Hochberg method.

460

#### 461 **Statistical analysis**

462 Statistical analyses were performed using R 3.6.1, Rstudio 1.2 and the following R packages: DEseq2  
463 1.24.0, stats 3.6.1, multcompView 0.1-8, Limma 3.40.6. For all analyses, a p-value of 0.05 was  
464 defined as the threshold of significance. For each figure, the exact value of n and the test used for the  
465 statistical analysis are indicated in the figure or in the corresponding legend. Fold change and p-  
466 values in Fig. 1b, 1c, 2b and 3 were computed using the quasi-likelihood negative binomial  
467 generalized log-linear model implemented in the edgeR package. Correlation coefficients and their  
468 associated p-value shown in Fig. 4 were calculated using Pearson correlation method. Statistical  
469 significance shown in Fig. 7E and 7G were obtained using Pairwise Wilcoxon Rank Sum Tests with  
470 data considered as paired and unpaired, respectively. In Fig. 7G, the proportion of uncapped RNA

471 was retrieved from Anderson et al. 2018 (GSE108852) for all transcripts detected in both this dataset  
472 and our RNA experiment. The proportion of uncapped RNA were measured in Col0 and corresponds  
473 to the ratio of the RPM from GMUCT for a given transcript (2 biological replicates) normalized by the  
474 RPM for that same transcript (4 biological replicates). Boxplot analysis were then performed to  
475 compare the proportion of uncapped RNA in all transcripts, non-regulated transcripts, and in transcript  
476 either up or down-regulated in D153N transgenic lines and vcs mutant. The identification of statistically  
477 significant overlap between gene-expression signatures in Venn diagrams shown in Fig. 7 are  
478 provided in TableS9 and were computed using the hypergeometric distribution implemented in the  
479 stats R package (v3.6.1). Statistical significance shown in Supplementary Fig S5 were obtained using  
480 the Limma moderated F-test. All p-value were adjusted using the Benjamini Hochberg method.

481

#### 482 **Quantitative real-time reverse transcriptase PCR (qRT-PCR)**

483 Three to six independent biological replicates of 14 days old seedlings were analyzed (see  
484 Supplementary Fig S5). RNA was extracted using TRI Reagent® (Sigma), genomic DNA was  
485 removed using the DNase RQ1 (PROMEGA), cDNA was synthesized using a mix of random  
486 hexamers and oligo d(T) by Superscript IV (Invitrogen). Technical triplicates qRT-PCR were performed  
487 with SYBR-green I Master Mix (Roche) using Light Cycler 480 (Roche), following the manufacturer's  
488 instructions. mRNA abundance was compared to two reference genes *ACT2* and *TIP41* (primer used  
489 in Table S12). The  $\Delta\Delta C_t$  method was used to calculate relative RNA abundance.

490

#### 491 **Phyllotactic pattern measurements**

492 Phyllotactic pattern was assessed on 35 successive siliques per plant on the main stem, starting from  
493 the first silique, on fully grown stems. Divergence angles were measured using a dedicated device as  
494 previously described (Peaucelle et al 2007). Angles were measured between the insertion points of  
495 two successive floral pedicels, independently of the outgrowth direction of the pedicel. Phyllotaxy  
496 orientation for each individual, was set to the direction giving the smallest average divergence angle.  
497 Measurements were performed on between three and four biological replicates, analysis of individual  
498 replicates are shown in Supplementary Fig S6.

499

#### 500 **Accession numbers**

501 Sequence data from this article can be found in the GenBank data libraries under accession numbers  
502 At1g15560 (DNE1); At1g08370 (DCP1); At5g13570 (DCP2); At3g13300 (VCS); AT3G13290 (VCR);  
503 At2g45810 (RH6); At4g00660 (RH8); At3g61240 (RH12); AT5G47010 (UPF1) At3g58570 (RH52);  
504 At4g34110 (PABP2); Niben101Scf05368g03015 (NbRBC); Niben101Scf00508g00007 (NbPLAST);  
505 Niben101Scf11490g00008 (NbTHIAM).

506

#### 507 **Large datasets**

508 RNAseq datasets generated during this study have been deposited in NCBI's Gene Expression  
509 Omnibus and are accessible through GEO Series accession number GSE155806.

510 Mass spectrometry proteomics raw data have been deposited to the ProteomeXchange Consortium  
511 via the PRIDE partner repository with the dataset identifier n° PXD020780, reviewer access:  
512 reviewer17858@ebi.ac.uk /Za2LUVLe.

513 Data shown in Supplementary Figure S1 were extracted from the pastDB project at  
514 <http://pastdb.crg.eu/>; (Martín et al., 2021).

515

## 516 SUPPLEMENTAL DATA

517 The following supplemental materials are available.

518 **Supplementary Figure S1.** Graphical representation showing normalized RNA-seq data for the  
519 expression of *DNE1*, *DCP1* and *DCP2* in *Arabidopsis* at 90 different developmental stages.

520 **Supplementary Figure S2.** Accumulation levels of RFP-DNE1 and RFP-D153N in the transient  
521 expression assay.

522 **Supplementary Figure S3.** Characterization of GFP-DNE1 transgenic lines.

523 **Supplementary Figure S4.** Characterization of GFP-D153N transgenic lines.

524 **Supplementary Figure S5.** Q-PCR validations of transcriptomic data on selected deregulated genes.

525 **Supplementary Figure S6.** Density plots showing the quantification of divergent angles for each  
526 biological replicate separately.

527 **Supplementary Table S1.** Details of biological material used for IPs.

528 **Supplementary Table S2.** List of proteins significantly enriched in YFP-DCP1 IPs.

529 **Supplementary Table S3.** List of proteins significantly enriched in GFP-DCP2 IPs.

530 **Supplementary Table S4.** List of proteins significantly enriched in GFP-DNE1 IPs.

531 **Supplementary Table S5.** List of proteins significantly enriched in crosslinked YFP-DCP1 IPs.

532 **Supplementary Table S6.** List of proteins significantly enriched in crosslinked GFP-DCP2 IPs.

533 **Supplementary Table S7.** List of proteins significantly enriched in crosslinked GFP-DNE1 IPs.

534 **Supplementary Table S8.** Amino acid identity and similarity of DNE1 protein domains (NYN, OST1,  
535 OST2) from representative streptophytes species.

536 **Supplementary Table S9.** Comparison between lists of differentially expressed genes using  
537 hypergeometric test.

538 **Supplementary Table S10.** Statistical analysis of the Q-PCR validations by moderated t-test.

539 **Supplementary Table S11.** Aligned sequences from *dne1-2* and *dne1-3* CRISPR-Cas9 mutants.

540 **Supplementary Table S12.** Analysis of the distribution of divergent angles in different biological  
541 replicates using the Kolmogorov-Smirnov test.

542 **Supplementary Table S13.** DNA oligonucleotides used in this study.

543

## 544 ACKNOWLEDGEMENTS

545 The authors thank C. Bousquet-Antonelli and J.M. Deragon for pDCP1::YFP-DCP1, pPABP2::tRFP-  
546 PABP2 constructs and lines. This research was funded by the Centre National de la Recherche

547 Scientifique (CNRS) and performed in the frame of the Interdisciplinary Thematic Institute IMCBio, as  
548 part of the ITI 2021-2028 program of the University of Strasbourg, CNRS and Inserm, was supported  
549 by IdEx Unistra (ANR-10-IDEX-0002), by SFRI-STRAT'US project (ANR 20-SFRI-0012), and EUR  
550 IMCBio (IMCBio ANR-17-EURE-0023) under the framework of the French Investments for the Future  
551 Program » as well as from the previous LabEx NetRNA (ANR-10-LABX-0036). The authors also  
552 acknowledge the funding of a QExactive Plus mass spectrometer (ThermoFisher) by an IdEx grant  
553 from the University of Strasbourg. The funders had no role in study design, data collection and  
554 analysis, decision to publish, or preparation of the manuscript.

## 555 556 FOOTNOTES

557  
558 This research was funded by an attractivity grant from the NetRNA LabEx, ANR-10-LABX-  
559 0036\_NETRNA (DG).

560  
561 Da.G. conceived the original research plans, supervised the work, analyzed the data and wrote the  
562 manuscript with major contributions of Do.G. and M.S.; M.S. performed and analyzed the  
563 transcriptomic and mass spectrometry experiments with help from P.H., J.C. L.K and HZ; C.C.  
564 performed preliminary experiments and colocalization studies; H.Z. developed scripts using R and  
565 data analysis; A.G. performed the phylogenetic analysis and 3D modeling of DNE1; A.P performed  
566 northern blot analyses; T.C. performed phenotypic analysis; E.U. performed western blot analyses;  
567 J.M. assisted with microscopy and built the system to measure phyllotaxis. Da.G. agrees to serve as  
568 the author responsible for contact and ensures communication.

## 569 570 FIGURES LEGENDS

571 **Figure 1. Identification of proteins associated with the decapping complex components DCP1**  
572 **and DCP2.**

573 **(A)** Western blot analysis of GFP immunoprecipitates (IPs) performed in triplicate on extracts from  
574 YFP-DCP1 *dcp1-3* and from GFP-DCP2 *tdt-1* complemented lines. Wild-type plants used as negative  
575 controls are shown in the right panel (control). **(B)** Semi-volcano plot of proteins enriched in YFP-  
576 DCP1 IPs (n=6), results provided in Supplementary Table S2. **(C)** Semi-volcano plot of proteins  
577 enriched in GFP-DCP2 IPs (n=3), results provided in Supplementary Table S3. Control IPs (n=6) for  
578 results presented in B and C. Colored points (yellow and magenta) indicate proteins significantly  
579 enriched with Log FoldChange (Log2FC) > 1 and adjusted p-value (adjp) < 0.05. Yellow points  
580 highlight expected partners of the decapping complex and DNE1. Coomassie staining (Coom), protein  
581 ladder (M), flow-through (FT) and immunoprecipitated fractions ( $\alpha$ -GFP IP).

582  
583 **Figure 2. Identification of proteins associated with the DCP1-associated endonuclease DNE1**

584 **(A)** Western blot analysis of GFP IPs performed in triplicate on extracts from GFP-DNE1 *dne1-1* lines.  
585 **(B)** Semi-volcano plot of proteins enriched in GFP-DNE1 IPs (n=8), control IPs (n=9), results provided  
586 in Supplementary Table S4. The volcano plot is represented as in Figure 1. **(C)** Specific growth on  
587 selective media for the DCP1-DNE1 and DCP1-D153N combinations highlights the direct interaction

588 between DCP1 and DNE1. Minimal SD medium –LT, -LTH and –LTAH were used, in which Adenine  
589 (A); Histidine (H); Leucin (L); Tryptophan (T). 5mM 3-AT was used to avoid autoactivation. T7:  
590 pGADT7 AD (LEU2); T9: pGBT9 BD (TRP1).

591

592

593 **Figure 3. Crosslinked immuno-precipitations improve the sensitivity for the identification of**  
594 **proteins associated with DCP1, DCP2 and DNE1.**

595 **(A)** Semi-volcano plot of proteins enriched in YFP-DCP1 crosslinked IPs (n=4), results provided in  
596 Supplementary Table S5. **(B)** Semi-volcano plot of proteins enriched in GFP-DCP2 crosslinked IPs  
597 (n=4), results provided in Supplementary Table S6. **(C)** Semi-volcano plot of proteins enriched in GFP-  
598 DNE1 crosslinked IPs (n=4), results provided in Supplementary Table S7. Control IPs (n=4) for results  
599 presented in A, B and C. Colored points (yellow and magenta) indicate proteins significantly enriched  
600 with Log FoldChange (Log2FC) > 1 and adjusted p-value (adjp) < 0.05. Yellow points highlight  
601 expected partners of the decapping complex and DNE1, cytosolic exoribonucleases XRN4 and SOV  
602 and the NMD protein UPF1.

603

604 **Figure 4. DNE1 co-localizes with DCP1 and UPF1 in p-bodies.**

605 **(A)** Confocal microscopy co-localization study of DNE1 with the stress granule marker PAB2-RFP, the  
606 P-body markers YFP-DCP1 and UPF1-RFP in stable *Arabidopsis* transformants. A 30 min heat stress  
607 at 37°C was applied to GFP-DNE1 PAB2-RFP to induce stress granule formation. Scale bar: 10µm. **(B)**  
608 Dot plot showing the quantification of foci co-localization in the green (ch1, y-axis) and red (ch2, x-axis)  
609 channels; The number of foci analyzed (n) is indicated on the plot. The calculated Pearson's  
610 correlation coefficient (r) and p-values are indicated.

611

612 **Figure 5. DNE1 is an evolutionary conserved NYN domain protein harboring two OST-HTH**  
613 **modules.**

614 **(A)** DNE1 phylogenetic tree obtained with the maximum likelihood method. Bootstrap values are  
615 indicated for each node. **(B)** Schematic domain structure of DNE1. In purple the catalytic NYN domain,  
616 in orange the OST-HTH predicted RNA binding domains. **(C)** Multiple alignment of amino-acid  
617 sequences of NYN domains from DNE1 plant orthologs as in (A). In purple the conserved aspartic  
618 acid residues important for catalysis. **(D)** Multiple alignments of amino-acid sequences of OST-HTH 1  
619 domains from DNE1 plant orthologs as in (A). **(E)** Structural alignment of the predicted tridimensional  
620 structure of AtDNE1 NYN domain sequence (in purple) with the tridimensional crystal structure of  
621 *HsMAREF1* NYN domain [6fdl, (Nishimura et al. 2018), in blue]. Conserved D residues are shown in  
622 orange. **(F)** Structural alignment of the predicted tridimensional structure of AtDNE1 OST-HTH1  
623 domain sequence (in yellow) with the tridimensional crystal structure of *MmMAREF1* OST-HTH1  
624 domain [5yad, (Yao et al., 2018), in orange].

625

626 **Figure 6. Transient expression of DNE1 impairs the expression of a co-expressed and**  
627 **endogenous mRNAs.**



628 Northern blot analysis showing the impact of the co-expression of DNE1 WT (WT) or DNE1 D153N  
629 (D153N) on mRNA accumulation in *N. benthamiana*, empty plasmid (-) is used as a control. Methylene  
630 blue staining showing ribosomal RNAs (rRNA) and a U6 probe are used as loading controls.

631

632 **Figure 7. Altering DNE1 expression impairs plant growth and leads to the same gene**  
633 **deregulation signature than mutations in VCS and DCP2.**

634 **(A)** Pictures of WT, *dne1-1*, GFP-DNE1 and GFP-D153N overexpressors (OE) 14 days after planting.  
635 Scale bar: 1cm. **(B)** Analysis of GFP-DNE1 and GFP-D153N transgenic lines by Western blot using  
636 anti GFP antibody. Two independent plant lines 1 and 2 are analyzed for GFP-DNE1 and one for the  
637 GFP-D153N. Coomassie staining used as a loading control (Coom). **(C)** Histogram showing the global  
638 changes in gene expression based on RNAseq analyses in *dne1-1*, GFP-DNE1 OE, GFP-D153N OE  
639 and *vcs-6* compared to WT. Genes were considered as upregulated and downregulated when  
640 adjusted p-value<0.05 and Log2FC>0.75 or Log2FC<-0.75, respectively (n≥3). Y-axis represent the  
641 number of deregulated genes **(D)** Venn diagrams showing comparisons between significantly  
642 upregulated or downregulated genes in DNE1 OE or D153N OE lines and *vcs-6*. **(E)** Boxplot  
643 comparing the change levels (Log2FC) between the different genotypes of the 64 genes that are  
644 commonly upregulated in both DNE1 and D153N lines. **(F)** Venn diagrams showing comparisons  
645 between significantly upregulated or downregulated genes in D153N OE, *vcs-6* and the weak *dcp2*  
646 mutant *tdt-1*. **(G)** Box plot showing the proportion of uncapped transcripts as found by GMUCT in  
647 (Anderson et al., 2018) for all genes detected in RNAseq (all), genes not deregulated in any  
648 genotypes (other) and genes deregulated in *vcs-6* or D153N OE lines. Letters in (E) and (G) show  
649 statistically different groups based on a Wilcoxon rank-sum test.

650

651 **Figure 8. Synergistic effect of mutations in *dne1* and *dcp2* on phyllotactic pattern.**

652 **(A)** Pictures showing representative stems from the WT, *dcp2<sup>its1</sup>*, *dne1-2*, *dne1-2 dcp2<sup>its1</sup>*, *dne1-3*,  
653 *dne1-3 dcp2<sup>its1</sup>* and *xrn4-3* plants. **(B)** Density plots showing the quantification of divergent angles from  
654 the genotypes shown in A. The analysis was performed on 3 to 4 biological replicates. Differences  
655 between divergent angles distribution was assessed using the Kolmogorov-Smirnov test, complete  
656 results are shown in Supplementary Table S12. The analysis is shown for each biological replicates  
657 separately in Supplementary Fig S6.

658

## 659 LITERATURE CITED

- 660 Anderson SJ, Kramer MC, Gosai SJ, Yu X, Vandivier LE, Nelson ADL, Anderson ZD, Beilstein MA, Fray RG,  
661 Lyons E, et al (2018) N6-Methyladenosine Inhibits Local Ribonucleolytic Cleavage to Stabilize mRNAs in  
662 Arabidopsis. Cell Rep 25: 1146-1157.e3
- 663 Arribas-Layton M, Wu D, Lykke-Andersen J, Song H (2013) Structural and functional control of the eukaryotic  
664 mRNA decapping machinery. Biochim Biophys Acta 1829: 580–589
- 665 Ayache J, Bénard M, Ernout-lange M, Minshall N, Standart N, Kress M, Weil D (2015) P-body assembly  
666 requires DDX6 repression complexes rather than decay or Ataxin2/2L complexes. Mol Biol Cell 26: 2579–  
667 2595

- 668 Bassal M, Abukhalaf M, Majovsky P, Thieme D, Herr T, Ayash M, Tabassum N, Al Shweiki MR, Proksch C,  
669 Hmedat A, et al (2020) Reshaping of the Arabidopsis thaliana Proteome Landscape and Co-regulation of  
670 Proteins in Development and Immunity. *Mol Plant* 13: 1709–1732
- 671 Besnard F, Refahi Y, Morin V, Marteaux B, Brunoud G, Chambrier P, Rozier F, Mirabet V, Legrand J, Lainé S,  
672 et al (2014) Cytokinin signalling inhibitory fields provide robustness to phyllotaxis. *Nature* 505: 417–421
- 673 Bloch DB, Li P, Bloch EG, Berenson DF, Galdos RL, Arora P, Malhotra R, Wu C, Yang W (2014)  
674 LMKB/MARF1 localizes to mRNA processing bodies, interacts with Ge-1, and regulates IFI44L gene  
675 expression. *PLoS One*. doi: 10.1371/journal.pone.0094784
- 676 Bouyssié D, Hesse A-M, Mouton-Barbosa E, Rompais M, Macron C, Carapito C, Gonzalez de Peredo A, Couté  
677 Y, Dupierris V, Burel A, et al (2020) Proline: an efficient and user-friendly software suite for large-scale  
678 proteomics. *Bioinformatics* 36: 3148–3155
- 679 Chang C Te, Bercovich N, Loh B, Jonas S, Izaurralde E (2014) The activation of the decapping enzyme DCP2  
680 by DCP1 occurs on the EDC4 scaffold and involves a conserved loop in DCP1. *Nucleic Acids Res* 42:  
681 5217–5233
- 682 Chantarachot T, Sorenson RS, Hummel M, Ke H, Kettenburg AT, Chen D, Aiyetiwa K, Dehesh K, Eulgem T,  
683 Sieburth LE, et al (2020) DHH1/DDX6-like RNA helicases maintain ephemeral half-lives of stress-  
684 response mRNAs. *Nat plants* 6: 675–685
- 685 Chicois C, Scheer H, Garcia S, Zuber H, Mutterer J, Chicher J, Hammann P, Gagliardi D, Garcia D (2018) The  
686 UPF1 interactome reveals interaction networks between RNA degradation and translation repression  
687 factors in Arabidopsis. *Plant J* 1: 119–132
- 688 Couttet P, Fromont-Racine M, Steel D, Pictet R, Grange T (1997) Messenger RNA deadenylation precedes  
689 decapping in mammalian cells. *Proc Natl Acad Sci U S A* 94: 5628–5633
- 690 Deyholos MK, Cavaness GF, Hall B, King E, Punwani J, Van Norman J, Sieburth LE (2003) Varicose, a WD-  
691 domain protein, is required for leaf blade. *Development* 130: 6577–6588
- 692 Ding D, Wei C, Dong K, Liu J, Stanton A, Xu C, Min J, Hu J, Chen C (2020) LOTUS domain is a novel class of  
693 G-rich and G-quadruplex RNA binding domain. *Nucleic Acids Res* 48: 9262–9272
- 694 Garcia D, Garcia S, Voinnet O (2014) Nonsense-mediated decay serves as a general viral restriction  
695 mechanism in plants. *Cell Host Microbe* 16: 391–402
- 696 Goeres DC, Van Norman JM, Zhang W, Fauver NA, Spencer M Lou, Sieburth LE (2007) Components of the  
697 Arabidopsis mRNA decapping complex are required for early seedling development. *Plant Cell* 19: 1549–  
698 1564
- 699 Kawa D, Meyer AJ, Dekker HL, Abd-El-Halim AM, Gevaert K, Van De Slijke E, Maszkowska J, Bucholc M,  
700 Dobrowolska G, De Jaeger G, et al (2020) SnRK2 protein kinases and mRNA decapping machinery  
701 control root development and response to salt. *Plant Physiol* 182: 361–371
- 702 Kelley LA, Mezulis S, Yates CM, Wass MN, Sternberg MJE (2015) The Phyre2 web portal for protein modeling,  
703 prediction and analysis. *Nat Protoc* 10: 845–858
- 704 Kim YKI, Maquat LE (2019) UPF1 and center in RNA decay: UPF1 in nonsense-mediated mRNA decay and  
705 beyond. *RNA* 25: 407–422
- 706 Lejeune F, Li X, Maquat LE (2003) Nonsense-mediated mRNA decay in mammalian cells involves decapping,  
707 deadenylating, and exonucleolytic activities. *Mol Cell* 12: 675–687

- 708 Martín G, Márquez Y, Mantica F, Duque P, Irimia M (2021) Alternative splicing landscapes in *Arabidopsis*  
709 *thaliana* across tissues and stress conditions highlight major functional differences with animals. *Genome*  
710 *Biol* 22: 35
- 711 Matelska D, Steczkiewicz K, Ginalski K (2017) Comprehensive classification of the PIN domain-like  
712 superfamily. *Nucleic Acids Res* 45: 6995–7020
- 713 Nagarajan VK, Kukulich PM, Von Hagel B, Green PJ (2019) RNA degradomes reveal substrates and  
714 importance for dark and nitrogen stress responses of *Arabidopsis* XRN4. *Nucleic Acids Res* 47: 9216–  
715 9230
- 716 Nishihara T, Zekri L, Braun JE, Izaurrealde E (2013) MiRISC recruits decapping factors to miRNA targets to  
717 enhance their degradation. *Nucleic Acids Res* 41: 8692–8705
- 718 Nishimura T, Fakim H, Brandmann T, Youn JY, Gingras AC, Jinek M, Fabian MR (2018) Human MARF1 is an  
719 endoribonuclease that interacts with the DCP1:2 decapping complex and degrades target mRNAs.  
720 *Nucleic Acids Res* 46: 12008–12021
- 721 Reinhardt D, Pesce ER, Stieger P, Mandel T, Baltensperger K, Bennett M, Traas J, Friml J, Kuhlemeier C  
722 (2003) Regulation of phyllotaxis by polar auxin transport. *Nature* 426: 255–260
- 723 She M, Decker CJ, Svergun DI, Round A, Chen N, Muhlrad D, Parker R, Song H (2008) Structural Basis of  
724 Dcp2 Recognition and Activation by Dcp1. *Mol Cell* 29: 337–349
- 725 Soma F, Mogami J, Yoshida T, Abekura M, Takahashi F, Kidokoro S, Mizoi J, Shinozaki K, Yamaguchi-  
726 Shinozaki K (2017) ABA-unresponsive SnRK2 protein kinases regulate mRNA decay under osmotic  
727 stress in plants. *Nat Plants*. doi: 10.1038/nplants.2016.204
- 728 Sorenson RS, Deshotel MJ, Johnson K, Adler FR, Sieburth LE (2018) *Arabidopsis* mRNA decay landscape  
729 arises from specialized RNA decay substrates, decapping-mediated feedback, and redundancy. *Proc Natl*  
730 *Acad Sci U S A* 115: E1485–E1494
- 731 Su YQ, Sugiura K, Sun F, Pendola JK, Cox GA, Handel MA, Schimenti JC, Eppig JJ (2012a) MARF1 regulates  
732 essential oogenic processes in mice. *Science* (80- ) 335: 1496–1499
- 733 Su YQ, Sun F, Handel MA, Schimentic JC, Eppig JJ (2012b) Meiosis arrest female 1 (MARF1) has nuage-like  
734 function in mammalian oocytes. *Proc Natl Acad Sci U S A* 109: 18653–18660
- 735 Tsutsui H, Higashiyama T (2017) pKAMA-ITACHI Vectors for Highly Efficient CRISPR/Cas9-Mediated Gene  
736 Knockout in *Arabidopsis thaliana*. *Plant Cell Physiol* 58: 46–56
- 737 Tuck AC, Rankova A, Arpat AB, Liechti LA, Hess D, Iesmantavicius V, Castelo-Szekely V, Gatfield D, Bühler M  
738 (2020) Mammalian RNA Decay Pathways Are Highly Specialized and Widely Linked to Translation. *Mol*  
739 *Cell* 77: 1222-1236.e13
- 740 Wurm JP, Sprangers R (2019) Dcp2: an mRNA decapping enzyme that adopts many different shapes and  
741 forms. *Curr Opin Struct Biol* 59: 115–123
- 742 Xu J, Chua NH (2009) *Arabidopsis* decapping 5 is required for mRNA decapping, P-body formation, and  
743 translational repression during postembryonic development. *Plant Cell* 21: 3270–3279
- 744 Xu J, Chua NH (2012) Dehydration stress activates *Arabidopsis* MPK6 to signal DCP1 phosphorylation. *EMBO*  
745 *J* 31: 1975–1984
- 746 Xu J, Yang JY, Niu QW, Chua NH (2006) *Arabidopsis* DCP2, DCP1, and VARICOSE form a decapping  
747 complex required for postembryonic development. *Plant Cell* 18: 3386–3398

- 748 Yao Q, Cao G, Li M, Wu B, Zhang X, Zhang T, Guo J, Yin H, Shi L, Chen J, et al (2018) Ribonuclease activity  
749 of MARF1 controls oocyte RNA homeostasis and genome integrity in mice. *Proc Natl Acad Sci U S A*  
750 115: 11250–11255
- 751 Youn JY, Dunham WH, Hong SJ, Knight JDR, Bashkurov M, Chen GI, Bagci H, Rathod B, MacLeod G, Eng  
752 SWM, et al (2018) High-Density Proximity Mapping Reveals the Subcellular Organization of mRNA-  
753 Associated Granules and Bodies. *Mol Cell* 69: 517-532.e11
- 754 Yu X, Li B, Jang GJ, Jiang S, Jiang D, Jang JC, Wu SH, Shan L, He P (2019) Orchestration of Processing  
755 Body Dynamics and mRNA Decay in Arabidopsis Immunity. *Cell Rep* 28: 2194-2205.e6

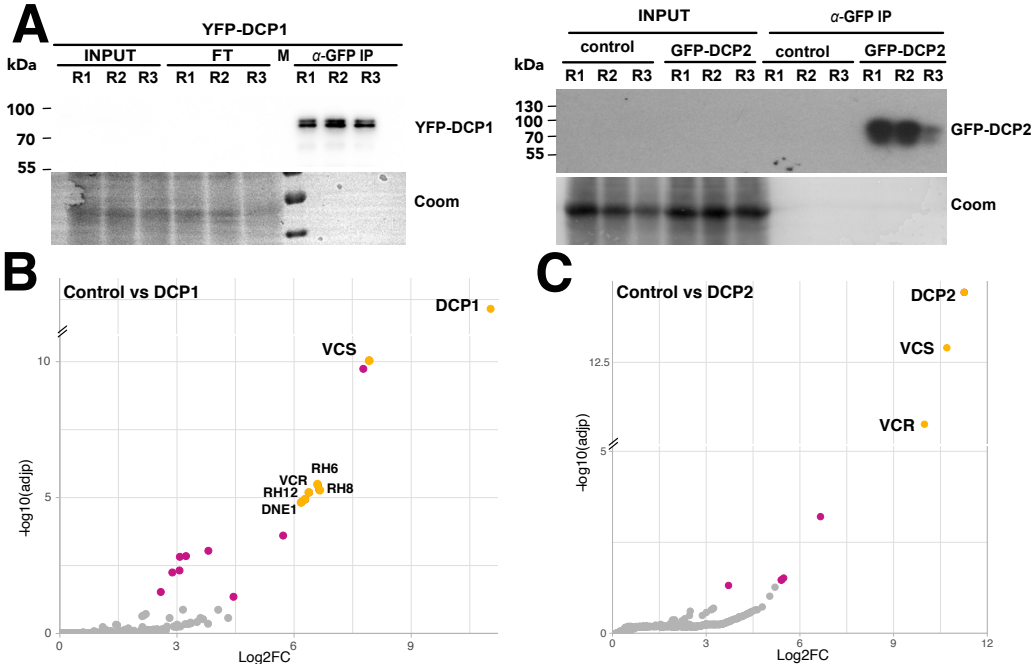

**Figure 1. Identification of proteins associated with the decapping complex components DCP1 and DCP2. (A)** Western blot analysis of GFP immunoprecipitates (IPs) performed in triplicate on extracts from YFP-DCP1 *dcp1-3* and from GFP-DCP2 *tdt-1* complemented lines. Wild-type plants used as negative controls are shown in the right panel (control). **(B)** Semi-volcano plot of proteins enriched in YFP-DCP1 IPs ( $n=6$ ), results provided in Supplementary Table S2. **(C)** Semi-volcano plot of proteins enriched in GFP-DCP2 IPs ( $n=3$ ), results provided in Supplementary Table S3. Control IPs ( $n=6$ ) for results presented in B and C. Colored points (yellow and magenta) indicate proteins significantly enriched with Log FoldChange ( $\text{Log}_2\text{FC}$ )  $> 1$  and adjusted p-value ( $\text{adjp}$ )  $< 0.05$ . Yellow points highlight expected partners of the decapping complex and DNE1. Coomassie staining (Coom), protein ladder (M), flow-through (FT) and immunoprecipitated fractions ( $\alpha$ -GFP IP).

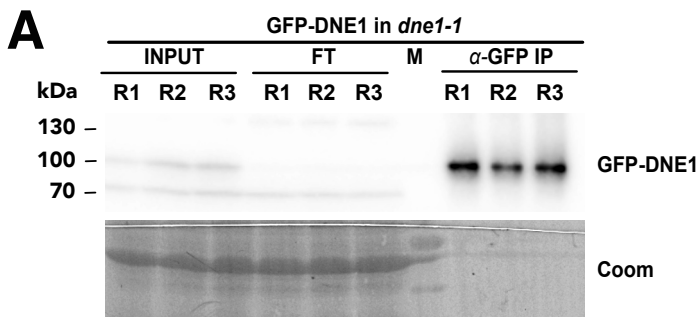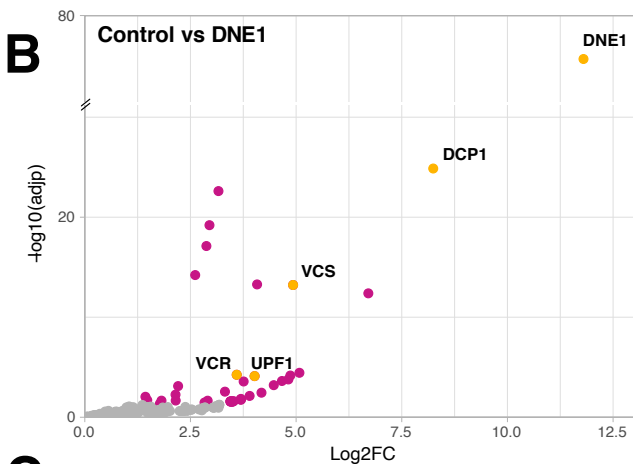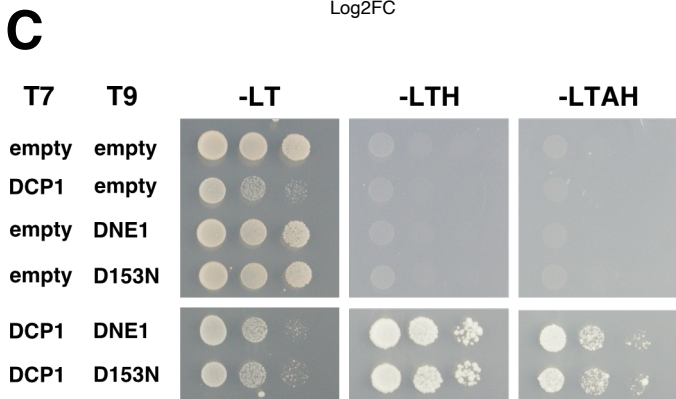

**Figure 2. Identification of proteins associated with the DCP1-associated endonuclease DNE1**

(A) Western blot analysis of GFP IPs performed in triplicate, on extracts from GFP-DNE1 *dne1-1* lines. (B) Semi-volcano plot of proteins enriched in GFP-DNE1 IPs (n=8), control IPs (n=9), results provided in Supplementary Table S4. The volcano plot is represented as in Fig. 1. (C) Specific growth on selective media for the DCP1-DNE1 and DCP1-D153N combinations highlights the direct interaction between DCP1 and DNE1. Minimal SD medium –LT, –LTH and –LTAH were used, in which Adenine (A); Histidine (H); Leucine (L); Tryptophan (T). 5mM 3-AT was used to avoid autoactivation. T7: pGAD7 AD (LEU2); T9: pGBT9 BD (TRP1).

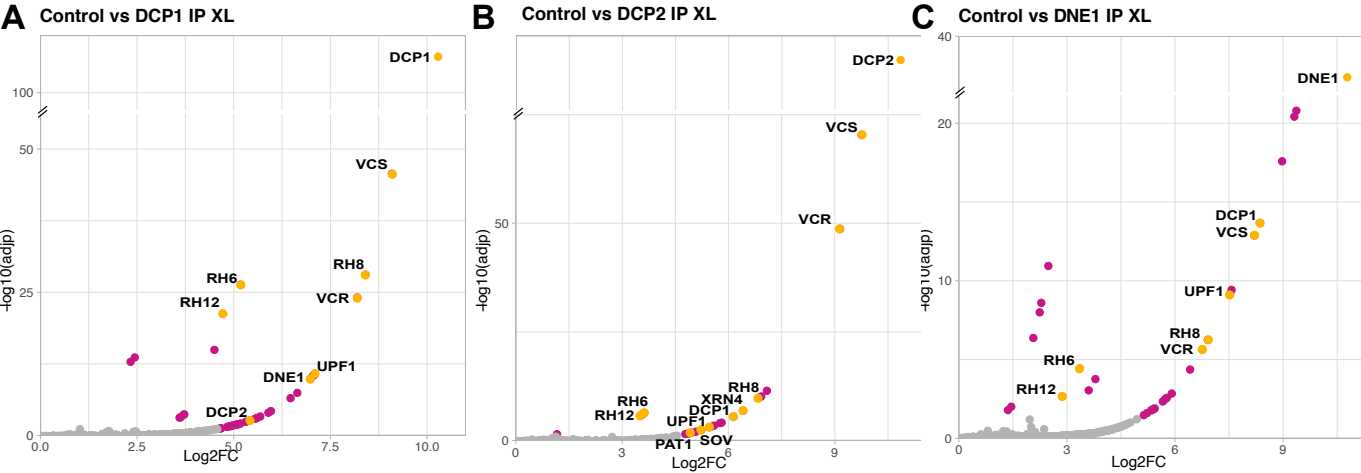

**Figure 3. Crosslinked immuno-precipitations improve the sensitivity for the identification of proteins associated with DCP1, DCP2 and DNE1.** (A) Semi-volcano plot of proteins enriched in YFP-DCP1 crosslinked IPs (n=4), results provided in Supplementary Table S5. (B) Semi-volcano plot of proteins enriched in GFP-DCP2 crosslinked IPs (n=4), results provided in Supplementary Table S6. (C) Semi-volcano plot of proteins enriched in GFP-DNE1 crosslinked IPs (n=4), results provided in Supplementary Table S7. Control IPs (n=4) for results presented in A, B and C. Colored points (yellow and magenta) indicate proteins significantly enriched with Log FoldChange (Log2FC) > 1 and adjusted p-value (adjp) < 0.05. Yellow points highlight expected partners of the decapping complex and DNE1, cytosolic exoribonucleases XRN4 and SOV and the NMD protein UPF1.

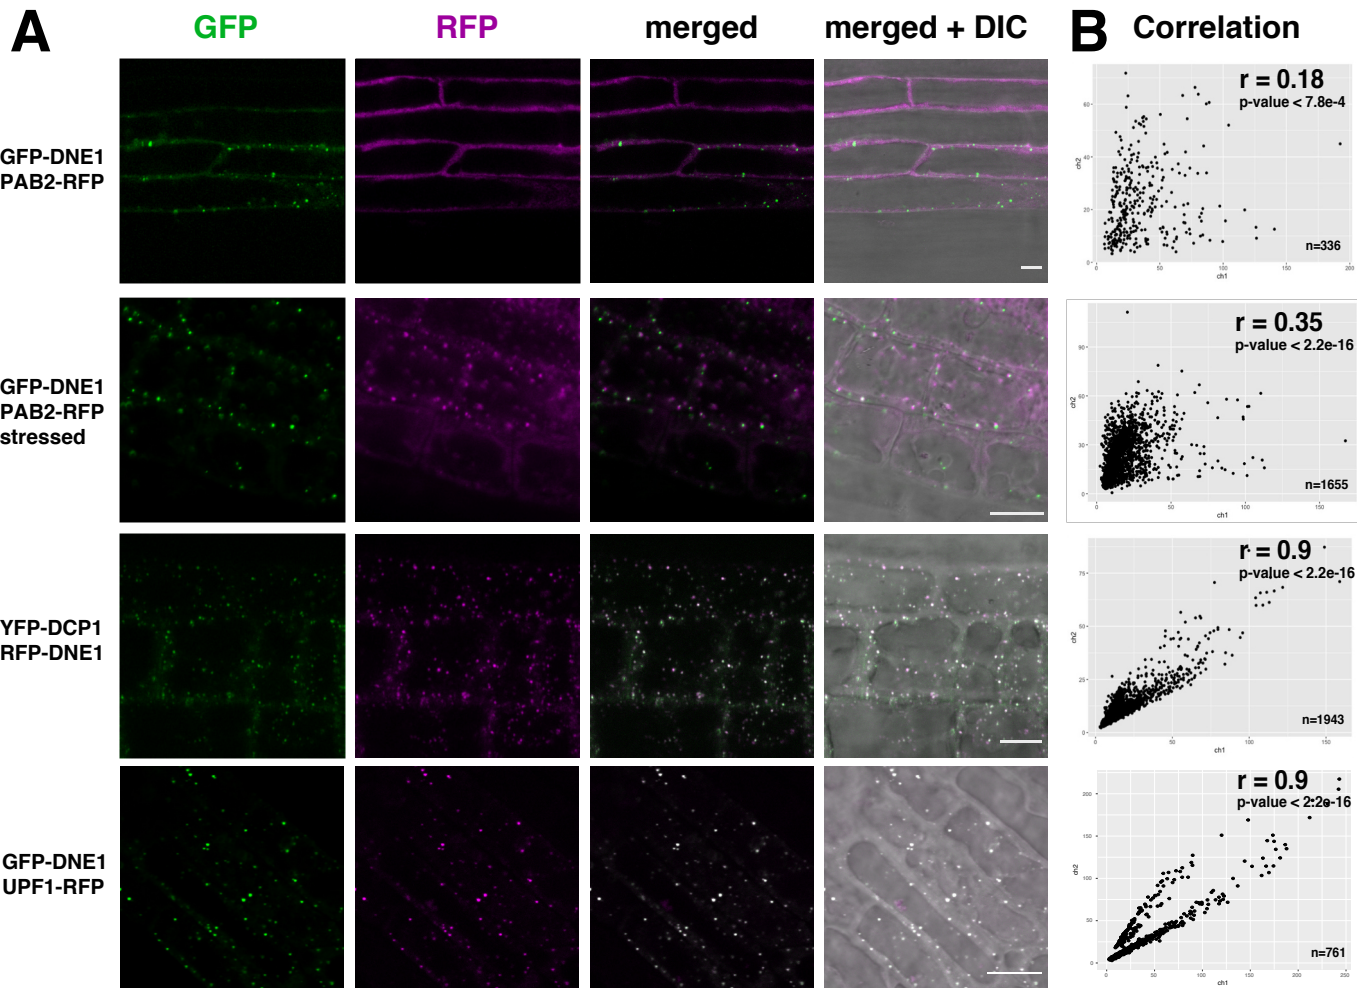

**Figure 4. DNE1 co-localizes with DCP1 and UPF1 in p-bodies. (A)** Confocal microscopy co-localization study of DNE1 with the stress granule marker PAB2-RFP, the P-body markers YFP-DCP1 and UPF1-RFP in stable *Arabidopsis* transformants. A 30 min heat stress at 37°C was applied to GFP-DNE1 PAB2-RFP to induce stress granule formation. Scale bar: 10µm. **(B)** Dot plot showing the quantification of foci co-localization in the green (ch1, y-axis) and red (ch2, x-axis) channels; The number of foci analyzed (n) is indicated on the plot. The calculated Pearson's correlation coefficient (r) and p-values are indicated.



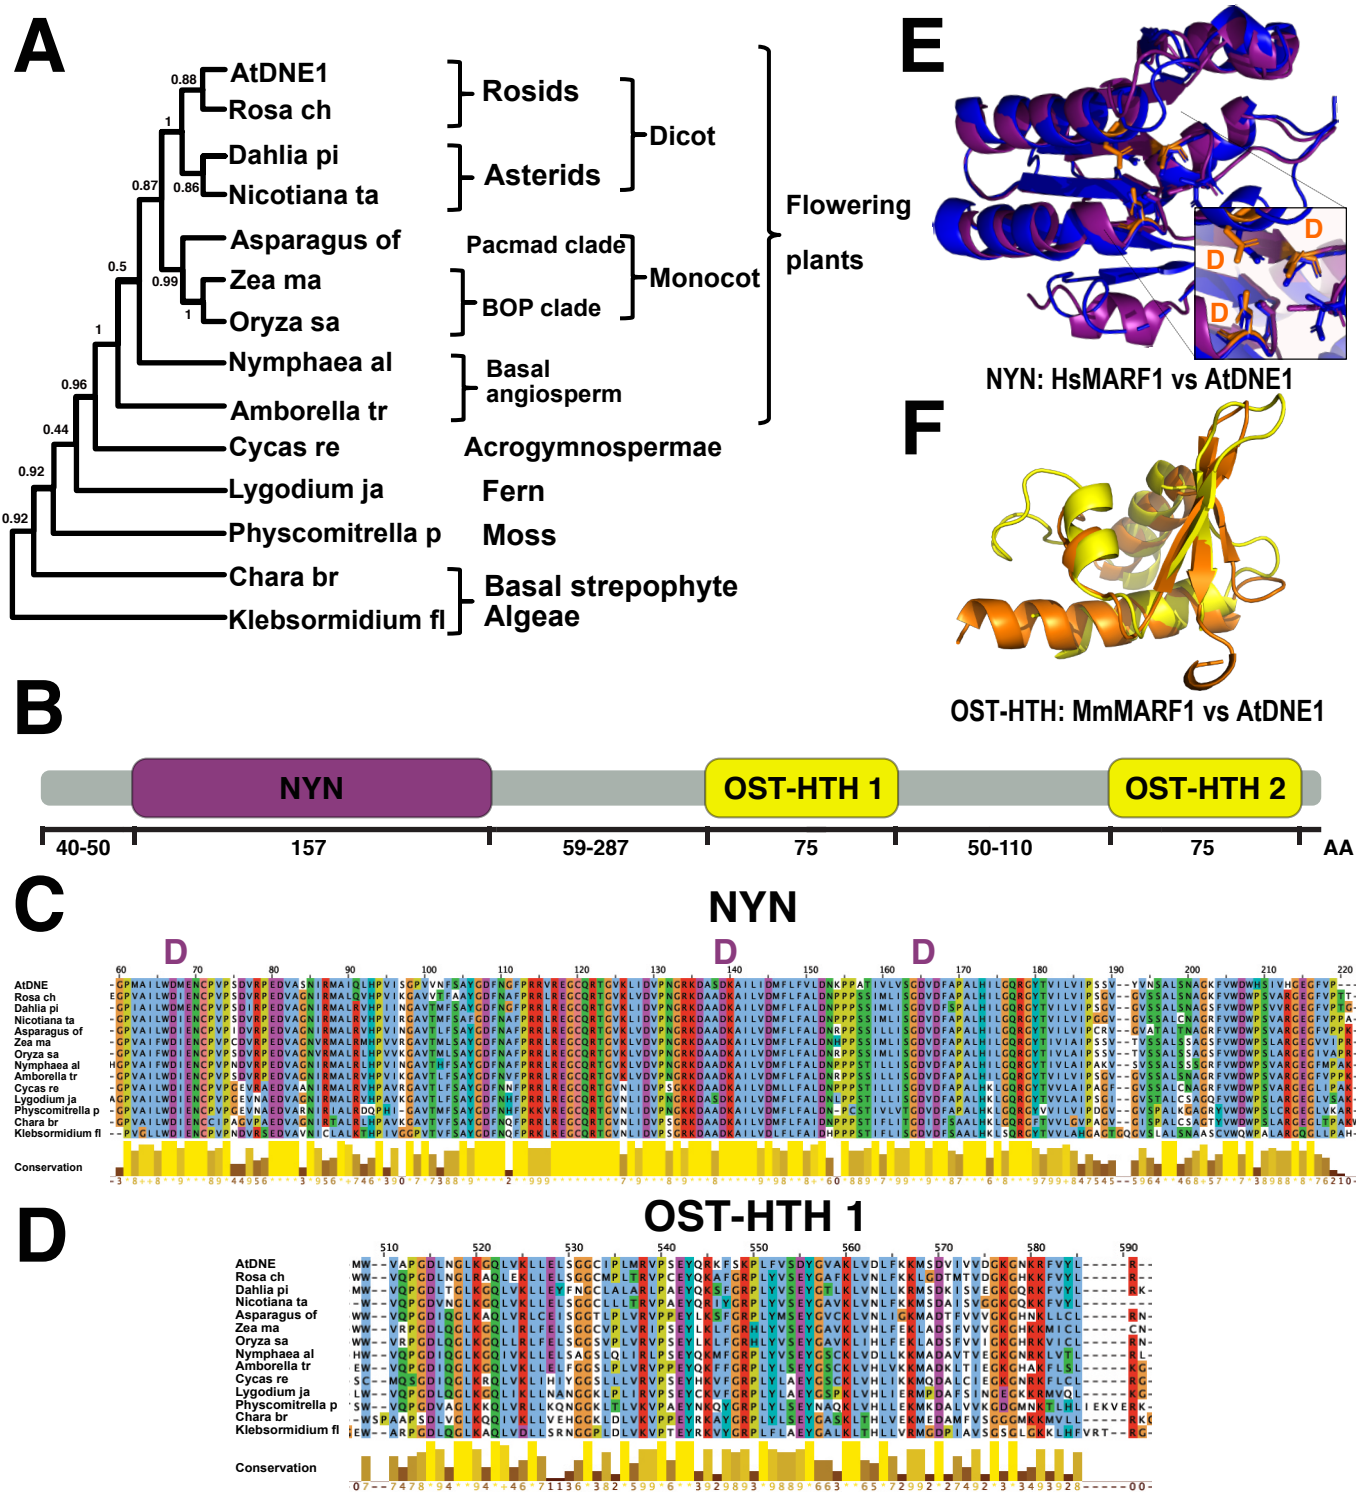

**Figure 5. DNE1 is an evolutionary conserved NYN domain protein harboring two OST-HTH modules. (A)** DNE1 phylogenetic tree obtained with the maximum likelihood method. Bootstrap values are indicated for each node. **(B)** Schematic domain structure of DNE1. In purple the catalytic NYN domain, in orange the OST-HTH predicted RNA binding domains. **(C)** Multiple alignment of amino-acid sequences of NYN domains from DNE1 plant orthologs as in (A). In purple the conserved aspartic acid residues important for catalysis. **(D)** Multiple alignments of amino-acid sequences of OST-HTH 1 domains from DNE1 plant orthologs as in (A). **(E)** Structural alignment of the predicted tridimensional structure of AtDNE1 NYN domain sequence (in purple) with the tridimensional crystal structure of HsMARF1 NYN domain [6fd, (Nishimura et al. 2018), in blue]. Conserved D residues are shown in orange. **(F)** Structural alignment of the predicted tridimensional structure of AtDNE1 OST-HTH1 domain sequence (in yellow) with the tridimensional crystal structure of MmMARF1 OST-HTH1 domain [5yad, (Yao et al., 2018), in orange].

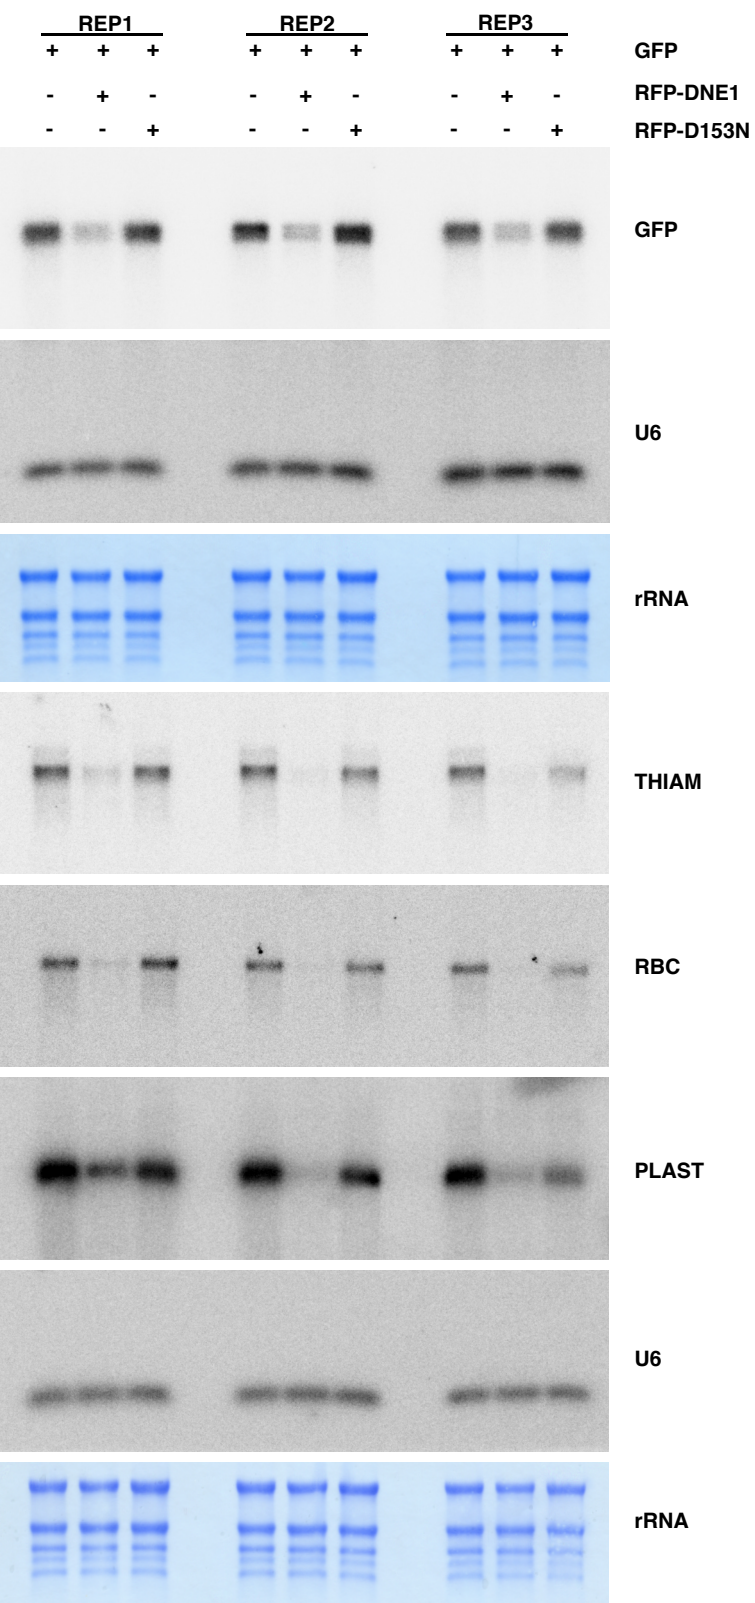

**Figure 6. Transient expression of DNE1 impairs the expression of a co-expressed and endogenous mRNAs.** Northern blot analysis showing the impact of the co-expression of DNE1 WT (WT) or DNE1 D153N (D153N) on mRNA accumulation in *N. benthamiana*, empty plasmid (-) is used as a control. Methylene blue staining showing ribosomal RNAs (rRNA) and a U6 probe are used as loading controls.

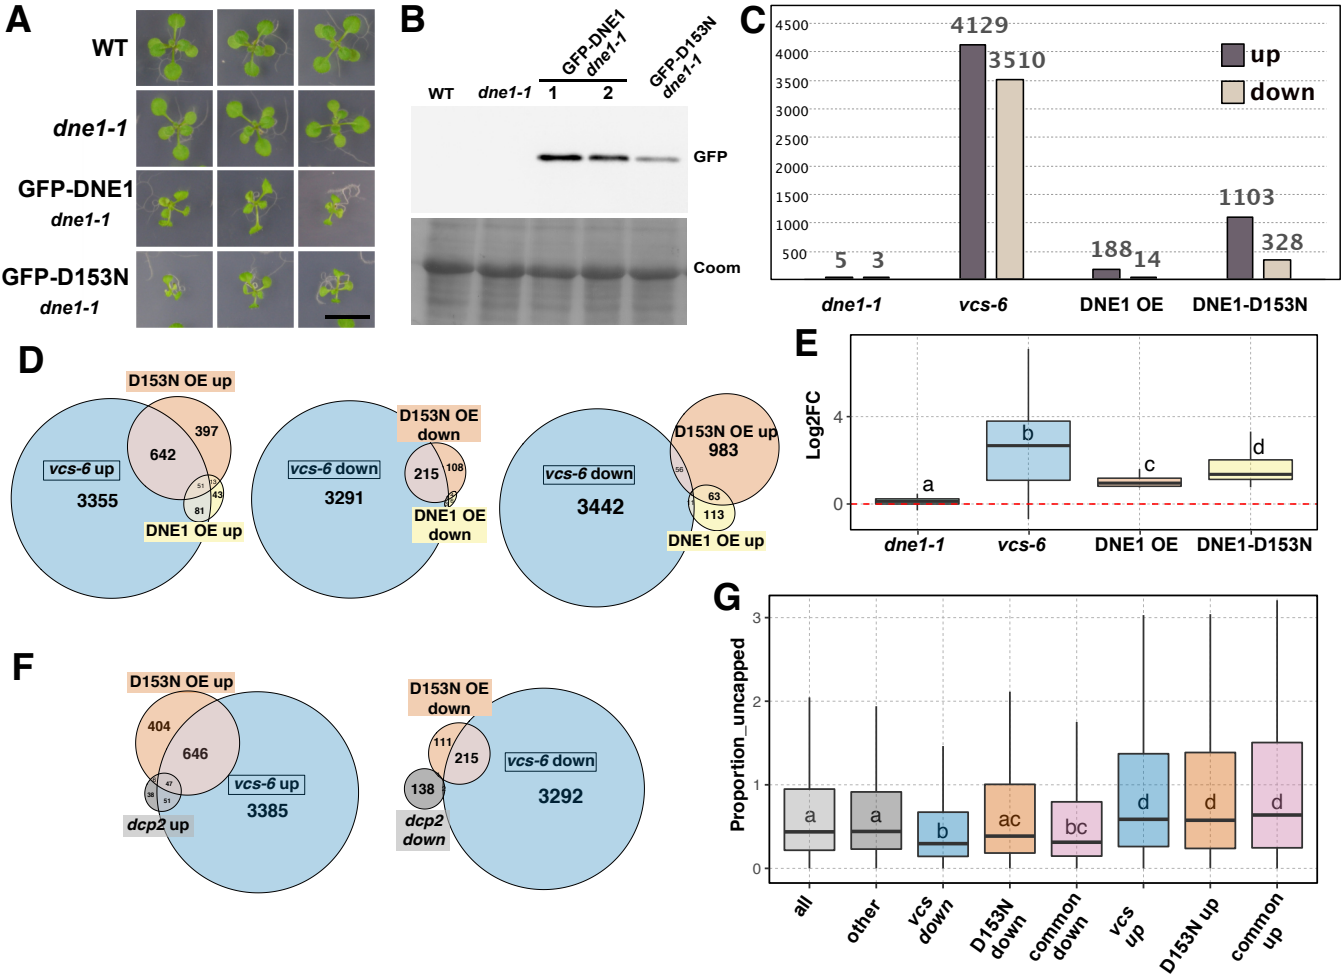

**Figure 7. Altering DNE1 expression impairs plant growth and leads to the same gene deregulation signature than mutations in VCS and DCP2. (A)** Pictures of WT, *dne1-1*, GFP-DNE1 and GFP-D153N overexpressors (OE) 14 days after planting. Scale bar: 1cm. **(B)** Analysis of GFP-DNE1 and GFP-D153N transgenic lines by Western blot using anti GFP antibody. Two independent plant lines 1 and 2 are analyzed for GFP-DNE1 and one for the GFP-D153N. Coomassie staining used as a loading control (Coom). **(C)** Histogram showing the global changes in gene expression based on RNAseq analyses in *dne1-1*, GFP-DNE1 OE, GFP-D153N OE and *vcs-6* compared to WT. Genes were considered as upregulated and downregulated when adjusted p-value<0.05 and Log2FC>0.75 or Log2FC<-0.75, respectively ( $n \geq 3$ ). Y-axis represent the number of deregulated genes **(D)** Venn diagrams showing comparisons between significantly upregulated or downregulated genes in DNE1 OE or D153N OE lines and *vcs-6*. **(E)** Boxplot comparing the change levels (Log2FC) between the different genotypes of the 64 genes that are commonly upregulated in both DNE1 and D153N lines. **(F)** Venn diagrams showing comparisons between significantly upregulated or downregulated genes in D153N OE, *vcs-6* and the weak *dcp2* mutant *tdt-1*. **(G)** Box plot showing the proportion of uncapped transcripts as found by GMUCT in (Anderson et al., 2018) for all genes detected in RNAseq (all), genes not deregulated in any genotypes (other) and genes deregulated in *vcs-6* or D153N OE lines. Letters in (E) and (G) show statistically different groups based on a Wilcoxon rank-sum test.

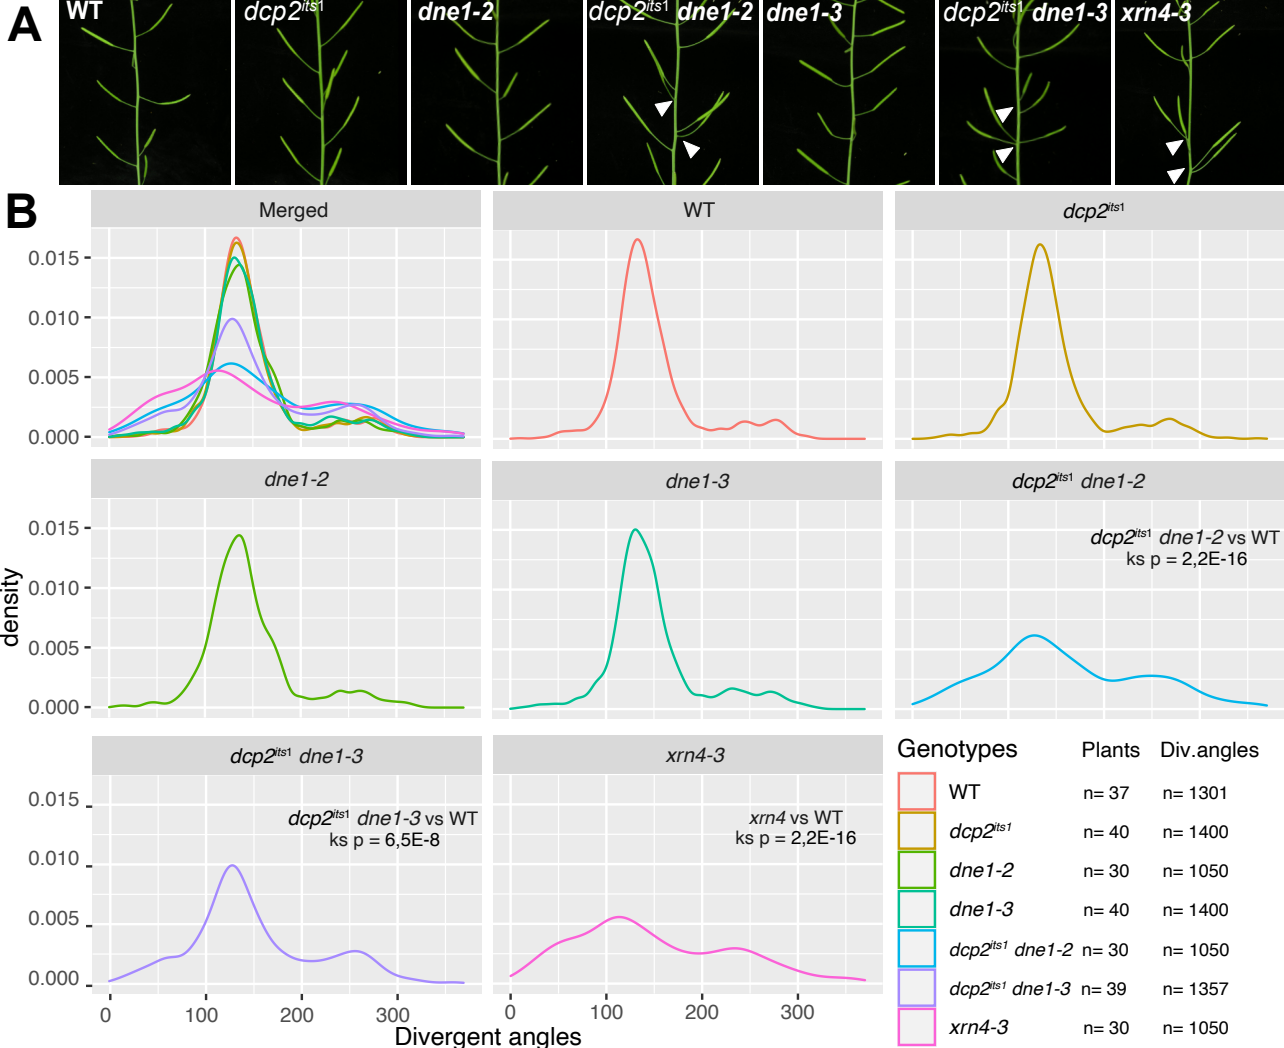

**Figure 8. Synergistic effect of mutations in *dne1* and *dcp2* on phyllotactic pattern.** (A) Pictures showing representative stems from the WT, *dcp2<sup>ts1</sup>*, *dne1-2*, *dne1-2 dcp2<sup>ts1</sup>*, *dne1-3*, *dne1-3 dcp2<sup>ts1</sup>* and *xrn4-3* plants. (B) Density plots showing the quantification of divergent angles from the genotypes shown in A. The analysis was performed on 3 to 4 biological replicates. Differences between divergent angles distribution was assessed using the Kolmogorov-Smirnov test, complete results are shown in Supplementary Table S12. The analysis is shown for each biological replicates separately in Supplementary Fig S6.

## Parsed Citations

Anderson SJ, Kramer MC, Gosai SJ, Yu X, Vandivier LE, Nelson ADL, Anderson ZD, Beilstein MA, Fray RG, Lyons E, et al (2018) N6-Methyladenosine Inhibits Local Ribonucleolytic Cleavage to Stabilize mRNAs in Arabidopsis. *Cell Rep* 25: 1146-1157.e3

Google Scholar: [Author Only](#) [Title Only](#) [Author and Title](#)

Arribas-Layton M, Wu D, Lykke-Andersen J, Song H (2013) Structural and functional control of the eukaryotic mRNA decapping machinery. *Biochim Biophys Acta* 1829: 580-589

Google Scholar: [Author Only](#) [Title Only](#) [Author and Title](#)

Ayache J, Bénard M, Ernoult-lange M, Minshall N, Standart N, Kress M, Weil D (2015) P-body assembly requires DDX6 repression complexes rather than decay or Ataxin2/2L complexes. *Mol Biol Cell* 26: 2579-2595

Google Scholar: [Author Only](#) [Title Only](#) [Author and Title](#)

Bassal M, Abukhalaf M, Majovsky P, Thieme D, Herr T, Ayash M, Tabassum N, Al Shweiki MR, Proksch C, Hmedat A, et al (2020) Reshaping of the Arabidopsis thaliana Proteome Landscape and Co-regulation of Proteins in Development and Immunity. *Mol Plant* 13: 1709-1732

Google Scholar: [Author Only](#) [Title Only](#) [Author and Title](#)

Besnard F, Refahi Y, Morin V, Marteaux B, Brunoud G, Chambrier P, Rozier F, Mirabet V, Legrand J, Lainé S, et al (2014) Cytokinin signalling inhibitory fields provide robustness to phyllotaxis. *Nature* 505: 417-421

Google Scholar: [Author Only](#) [Title Only](#) [Author and Title](#)

Bloch DB, Li P, Bloch EG, Berenson DF, Galdos RL, Arora P, Malhotra R, Wu C, Yang W (2014) LMKB/MARF1 localizes to mRNA processing bodies, interacts with Ge-1, and regulates IFR44L gene expression. *PLoS One*. doi: 10.1371/journal.pone.0094784

Google Scholar: [Author Only](#) [Title Only](#) [Author and Title](#)

Bouyssié D, Hesse A-M, Mouton-Barbosa E, Rompais M, Macron C, Carapito C, Gonzalez de Peredo A, Couté Y, Dupierris V, Burel A, et al (2020) Proline: an efficient and user-friendly software suite for large-scale proteomics. *Bioinformatics* 36: 3148-3155

Google Scholar: [Author Only](#) [Title Only](#) [Author and Title](#)

Chang C Te, Bercovich N, Loh B, Jonas S, Izaurralde E (2014) The activation of the decapping enzyme DCP2 by DCP1 occurs on the EDC4 scaffold and involves a conserved loop in DCP1. *Nucleic Acids Res* 42: 5217-5233

Google Scholar: [Author Only](#) [Title Only](#) [Author and Title](#)

Chantarachot T, Sorenson RS, Hummel M, Ke H, Kettenburg AT, Chen D, Aiyetiwa K, Dehesh K, Eulgem T, Sieburth LE, et al (2020) DHH1/DDX6-like RNA helicases maintain ephemeral half-lives of stress-response mRNAs. *Nat plants* 6: 675-685

Google Scholar: [Author Only](#) [Title Only](#) [Author and Title](#)

Chicois C, Scheer H, Garcia S, Zuber H, Mutterer J, Chicher J, Hammann P, Gagliardi D, Garcia D (2018) The UPF1 interactome reveals interaction networks between RNA degradation and translation repression factors in Arabidopsis. *Plant J* 1: 119-132

Google Scholar: [Author Only](#) [Title Only](#) [Author and Title](#)

Couttet P, Fromont-Racine M, Steel D, Pictet R, Grange T (1997) Messenger RNA deadenylation precedes decapping in mammalian cells. *Proc Natl Acad Sci U S A* 94: 5628-5633

Google Scholar: [Author Only](#) [Title Only](#) [Author and Title](#)

Deyholos MK, Cavaness GF, Hall B, King E, Punwani J, Van Norman J, Sieburth LE (2003) Varicose, a WD-domain protein, is required for leaf blade. *Development* 130: 6577-6588

Google Scholar: [Author Only](#) [Title Only](#) [Author and Title](#)

Ding D, Wei C, Dong K, Liu J, Stanton A, Xu C, Min J, Hu J, Chen C (2020) LOTUS domain is a novel class of G-rich and G-quadruplex RNA binding domain. *Nucleic Acids Res* 48: 9262-9272

Google Scholar: [Author Only](#) [Title Only](#) [Author and Title](#)

Garcia D, Garcia S, Voinnet O (2014) Nonsense-mediated decay serves as a general viral restriction mechanism in plants. *Cell Host Microbe* 16: 391-402

Google Scholar: [Author Only](#) [Title Only](#) [Author and Title](#)

Goeres DC, Van Norman JM, Zhang W, Fauver NA, Spencer M Lou, Sieburth LE (2007) Components of the Arabidopsis mRNA decapping complex are required for early seedling development. *Plant Cell* 19: 1549-1564

Google Scholar: [Author Only](#) [Title Only](#) [Author and Title](#)

Kawa D, Meyer AJ, Dekker HL, Abd-El-Haliem AM, Gevaert K, Van De Slijke E, Maszkowska J, Bucholc M, Dobrowolska G, De Jaeger G, et al (2020) SnRK2 protein kinases and mRNA decapping machinery control root development and response to salt. *Plant Physiol* 182: 361-371

Google Scholar: [Author Only](#) [Title Only](#) [Author and Title](#)

Kelley LA, Mezulis S, Yates CM, Wass MN, Sternberg MJE (2015) The Phyre2 web portal for protein modeling, prediction and analysis. *Nat Protoc* 10: 845-858

Google Scholar: [Author Only](#) [Title Only](#) [Author and Title](#)

Kim YKI, Maquat LE (2019) UPF1 in nonsense-mediated mRNA decay and beyond. *RNA* 25: 407-422

Google Scholar: [Author Only](#) [Title Only](#) [Author and Title](#)

**Lejeune F, Li X, Maquat LE (2003) Nonsense-mediated mRNA decay in mammalian cells involves decapping, deadenylation, and exonucleolytic activities. *Mol Cell* 12: 675–687**

Google Scholar: [Author Only](#) [Title Only](#) [Author and Title](#)

**Martín G, Márquez Y, Mantica F, Duque P, Irimia M (2021) Alternative splicing landscapes in *Arabidopsis thaliana* across tissues and stress conditions highlight major functional differences with animals. *Genome Biol* 22: 35**

Google Scholar: [Author Only](#) [Title Only](#) [Author and Title](#)

**Matelska D, Steczkiewicz K, Ginalski K (2017) Comprehensive classification of the PIN domain-like superfamily. *Nucleic Acids Res* 45: 6995–7020**

Google Scholar: [Author Only](#) [Title Only](#) [Author and Title](#)

**Nagarajan VK, Kukulich PM, Von Hage B, Green PJ (2019) RNA degradomes reveal substrates and importance for dark and nitrogen stress responses of *Arabidopsis* XRN4. *Nucleic Acids Res* 47: 9216–9230**

Google Scholar: [Author Only](#) [Title Only](#) [Author and Title](#)

**Nishihara T, Zekri L, Braun JE, Izaurralde E (2013) MiRISC recruits decapping factors to miRNA targets to enhance their degradation. *Nucleic Acids Res* 41: 8692–8705**

Google Scholar: [Author Only](#) [Title Only](#) [Author and Title](#)

**Nishimura T, Fakim H, Brandmann T, Youn JY, Gingras AC, Jinek M, Fabian MR (2018) Human MARF1 is an endoribonuclease that interacts with the DCP1:2 decapping complex and degrades target mRNAs. *Nucleic Acids Res* 46: 12008–12021**

Google Scholar: [Author Only](#) [Title Only](#) [Author and Title](#)

**Reinhardt D, Pesce ER, Stieger P, Mandel T, Baltensperger K, Bennett M, Traas J, Friml J, Kuhlemeier C (2003) Regulation of phyllotaxis by polar auxin transport. *Nature* 426: 255–260**

Google Scholar: [Author Only](#) [Title Only](#) [Author and Title](#)

**She M, Decker CJ, Svergun DI, Round A, Chen N, Muhlrud D, Parker R, Song H (2008) Structural Basis of Dcp2 Recognition and Activation by Dcp1. *Mol Cell* 29: 337–349**

Google Scholar: [Author Only](#) [Title Only](#) [Author and Title](#)

**Soma F, Mogami J, Yoshida T, Abekura M, Takahashi F, Kidokoro S, Mizoi J, Shinozaki K, Yamaguchi-Shinozaki K (2017) ABA-unresponsive SnRK2 protein kinases regulate mRNA decay under osmotic stress in plants. *Nat Plants*. doi: 10.1038/nplants.2016.204**

Google Scholar: [Author Only](#) [Title Only](#) [Author and Title](#)

**Sorenson RS, Deshotel MJ, Johnson K, Adler FR, Sieburth LE (2018) *Arabidopsis* mRNA decay landscape arises from specialized RNA decay substrates, decapping-mediated feedback, and redundancy. *Proc Natl Acad Sci U S A* 115: E1485–E1494**

Google Scholar: [Author Only](#) [Title Only](#) [Author and Title](#)

**Su YQ, Sugiura K, Sun F, Pendola JK, Cox GA, Handel MA, Schimenti JC, Eppig JJ (2012a) MARF1 regulates essential oogenic processes in mice. *Science* (80- ) 335: 1496–1499**

Google Scholar: [Author Only](#) [Title Only](#) [Author and Title](#)

**Su YQ, Sun F, Handel MA, Schimenti JC, Eppig JJ (2012b) Meiosis arrest female 1 (MARF1) has nuage-like function in mammalian oocytes. *Proc Natl Acad Sci U S A* 109: 18653–18660**

Google Scholar: [Author Only](#) [Title Only](#) [Author and Title](#)

**Tsutsui H, Higashiyama T (2017) pKAMA-ITACHI Vectors for Highly Efficient CRISPR/Cas9-Mediated Gene Knockout in *Arabidopsis thaliana*. *Plant Cell Physiol* 58: 46–56**

Google Scholar: [Author Only](#) [Title Only](#) [Author and Title](#)

**Tuck AC, Rankova A, Arpat AB, Liechti LA, Hess D, Iesmantavicius V, Castelo-Szekely V, Gatfield D, Bühler M (2020) Mammalian RNA Decay Pathways Are Highly Specialized and Widely Linked to Translation. *Mol Cell* 77: 1222-1236.e13**

Google Scholar: [Author Only](#) [Title Only](#) [Author and Title](#)

**Wurm JP, Sprangers R (2019) Dcp2: an mRNA decapping enzyme that adopts many different shapes and forms. *Curr Opin Struct Biol* 59: 115–123**

Google Scholar: [Author Only](#) [Title Only](#) [Author and Title](#)

**Xu J, Chua NH (2009) *Arabidopsis* decapping 5 is required for mRNA decapping, P-body formation, and translational repression during postembryonic development. *Plant Cell* 21: 3270–3279**

Google Scholar: [Author Only](#) [Title Only](#) [Author and Title](#)

**Xu J, Chua NH (2012) Dehydration stress activates *Arabidopsis* MPK6 to signal DCP1 phosphorylation. *EMBO J* 31: 1975–1984**

Google Scholar: [Author Only](#) [Title Only](#) [Author and Title](#)

**Xu J, Yang JY, Niu QW, Chua NH (2006) *Arabidopsis* DCP2, DCP1, and VARICOSE form a decapping complex required for postembryonic development. *Plant Cell* 18: 3386–3398**

Google Scholar: [Author Only](#) [Title Only](#) [Author and Title](#)

**Yao Q, Cao G, Li M, Wu B, Zhang X, Zhang T, Guo J, Yin H, Shi L, Chen J, et al (2018) Ribonuclease activity of MARF1 controls oocyte**

**RNA homeostasis and genome integrity in mice. Proc Natl Acad Sci U S A 115: 11250–11255**

Google Scholar: [Author Only](#) [Title Only](#) [Author and Title](#)

**Youn JY, Dunham WH, Hong SJ, Knight JDR, Bashkurov M, Chen GI, Bagci H, Rathod B, MacLeod G, Eng SWM, et al (2018) High-Density Proximity Mapping Reveals the Subcellular Organization of mRNA-Associated Granules and Bodies. Mol Cell 69: 517-532.e11**

Google Scholar: [Author Only](#) [Title Only](#) [Author and Title](#)

**Yu X, Li B, Jang GJ, Jiang S, Jiang D, Jang JC, Wu SH, Shan L, He P (2019) Orchestration of Processing Body Dynamics and mRNA Decay in Arabidopsis Immunity. Cell Rep 28: 2194-2205.e6**

Google Scholar: [Author Only](#) [Title Only](#) [Author and Title](#)
